# Supplementary material for: Genetic Divergence in Domestic Japanese Quail Inferred from Mitochondrial DNA D-Loop and Microsatellite Markers
Source: PLOS journal article supplement (doi:10.1371/journal.pone.0169978), 2017-01-20

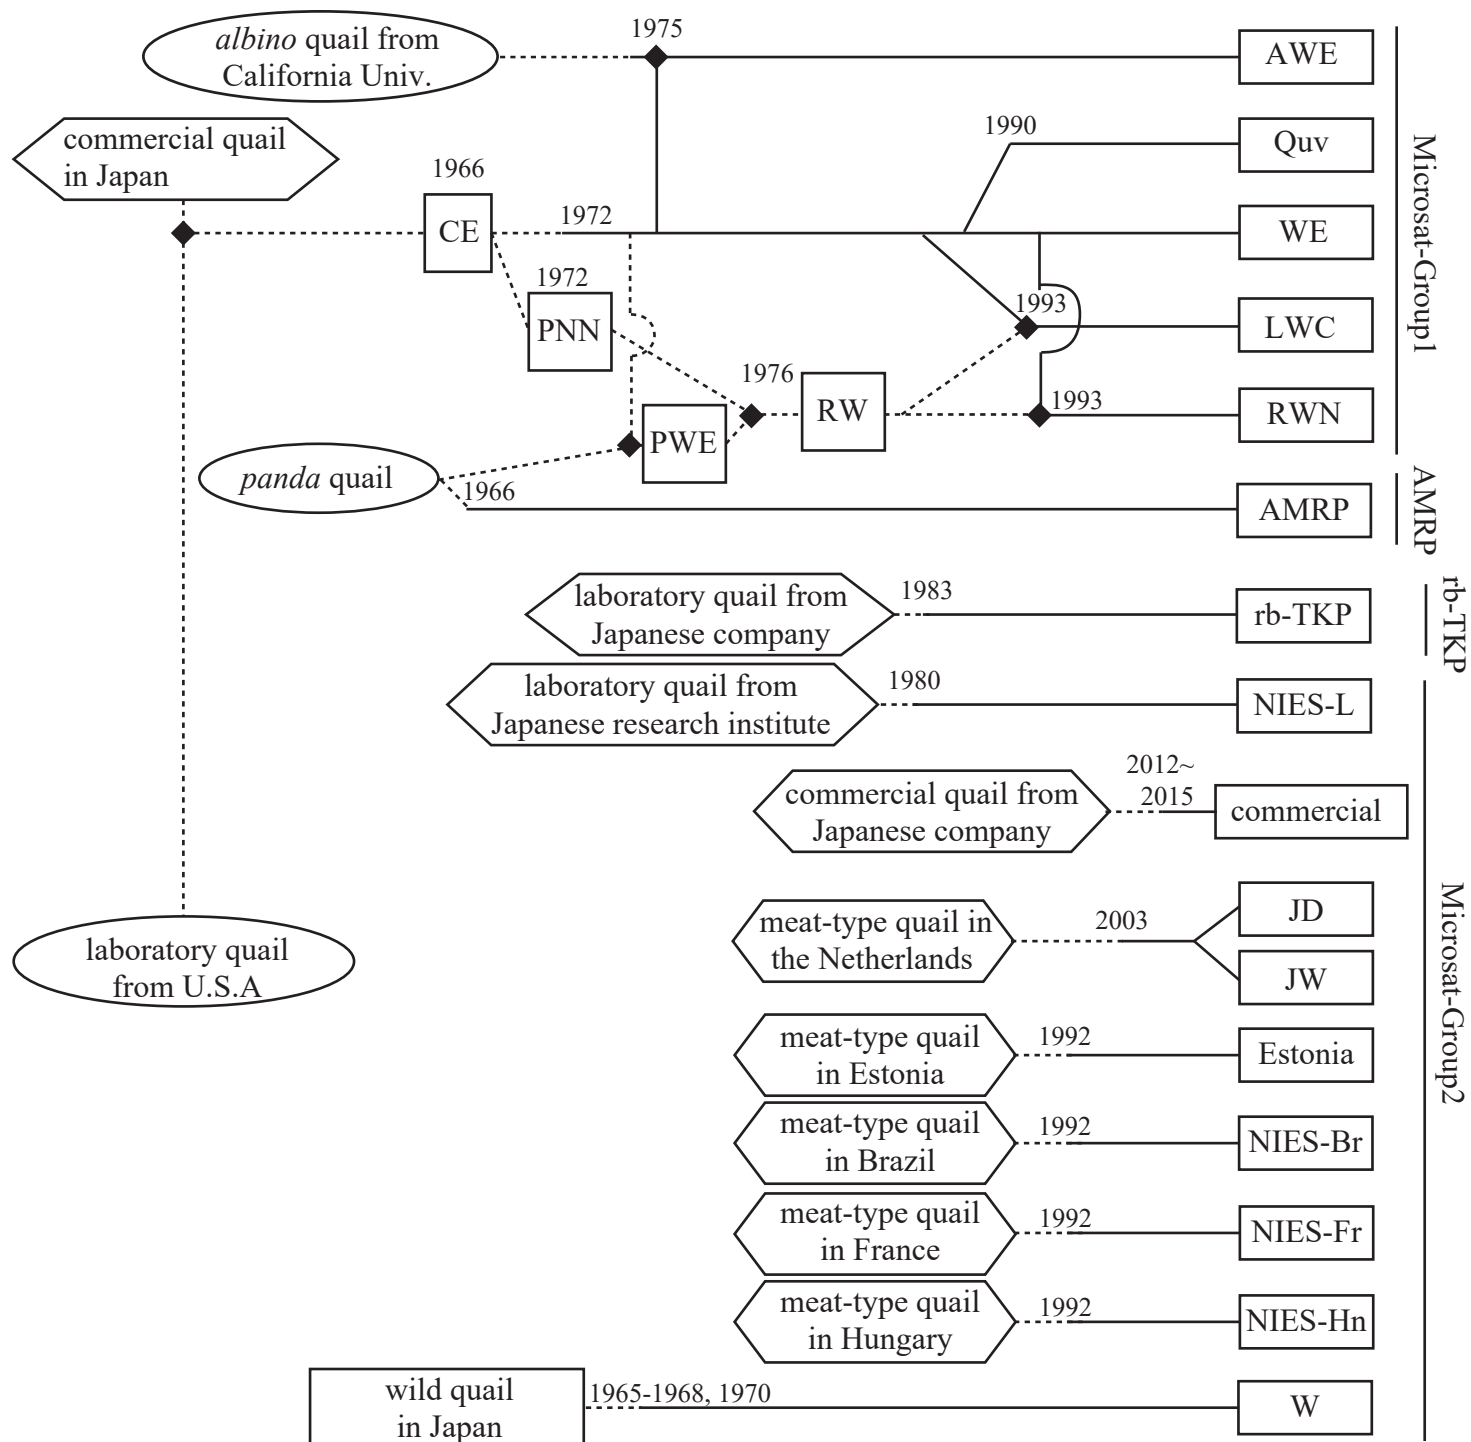

Supplement: S1 (10.1371/journal.pone.0169978.s001) [file journal.pone.0169978.s001]
