# Supplementary material for: Genetic Divergence in Domestic Japanese Quail Inferred from Mitochondrial DNA D-Loop and Microsatellite Markers
Source: PLoS One. 2017 Jan 20;12(1):e0169978. doi: 10.1371/journal.pone.0169978 (PMC5249226; doi:10.1371/journal.pone.0169978)
Supplement: S1 File — (XLSX) [file pone.0169978.s010.xlsx]

## Sheet: S1 File
S1 File. Microsatellite genotypes for Japanese quail samples used in this study.
Individual name	Population name	Microsatellite markers
		NGJ0004		NGJ0008		NGJ0011		NGJ0012		NGJ0013		NGJ0015		NGJ0017		NGJ0018		NGJ0022		NGJ0024		NGJ0025		NGJ0026		NGJ0028		NGJ0030		NGJ0032		NGJ0035		NGJ0036		NGJ0039		NGJ0040		NGJ0043		NGJ0044		NGJ0045		NGJ0050
LWC1	LWC	159	160	187	189	157	157	248	248	247	270	92	98	107	107	232	232	165	165	313	330	202	202	130	130	232	232	169	175	151	151	142	142	270	271	145	145	237	237	262	262	210	212	109	109	265	298
LWC2	LWC	159	159	189	189	157	157	248	248	239	239	98	98	107	107	232	232	165	165	293	293	202	202	124	133	232	232	169	182	151	159	142	142	273	273	142	142	237	237	256	256	210	210	109	109	261	274
LWC3	LWC	159	160	187	187	157	157	248	248	239	270	92	92	107	107	232	232	163	165	293	330	202	202	124	130	232	232	169	169	151	151	142	142	271	273	145	145	237	237	262	262	210	210	109	109	265	298
LWC4	LWC	159	159	187	189	157	157	248	248	239	239	92	98	107	107	232	234	165	165	293	293	195	195	130	133	232	234	175	182	151	159	142	142	273	273	142	142	237	237	256	256	210	210	109	109	265	298
LWC5	LWC	159	159	187	189	157	157	248	248	270	270	92	98	107	107	232	234	163	165	293	293	195	195	130	130	226	232	169	169	151	151	142	142	273	275	143	143	237	237	256	262	210	210	109	109	265	298
LWC6	LWC	159	159	187	189	157	159	248	248	270	270	98	98	107	107	232	234	163	163	293	313	195	202	130	130	232	232	169	169	151	151	142	142	273	275	142	142	237	237	256	262	210	210	109	109	261	274
LWC7	LWC	159	160	189	189	157	157	248	248	239	270	92	92	107	128	232	234	163	165	293	330	191	195	124	130	228	232	169	182	151	151	142	142	270	271	0	0	237	237	262	262	210	210	109	109	265	298
LWC8	LWC	159	159	187	189	157	157	248	248	239	270	98	98	107	107	232	234	165	165	293	313	195	202	130	130	232	232	169	175	151	159	142	142	273	273	143	143	237	237	256	262	210	210	109	109	261	298
LWC9	LWC	159	159	187	187	157	159	248	248	239	270	92	98	107	107	232	234	165	165	293	293	195	202	130	130	232	232	169	169	151	151	142	142	273	275	143	143	237	237	262	262	210	210	109	109	265	298
LWC10	LWC	159	160	187	189	157	157	248	248	239	270	92	98	107	107	232	232	165	165	293	330	202	202	130	130	232	232	175	182	151	151	142	142	271	275	145	145	237	237	256	262	210	212	109	109	265	298
LWC11	LWC	159	160	187	189	157	159	248	248	270	270	92	98	107	128	232	234	163	165	313	330	195	202	130	130	226	228	169	182	151	151	142	142	270	271	142	142	237	237	256	256	210	210	109	109	265	298
LWC12	LWC	159	159	187	189	157	159	248	248	239	239	92	98	107	107	234	234	163	165	293	293	202	202	130	130	232	232	169	169	151	151	142	142	273	275	143	143	237	237	262	262	210	210	109	109	261	274
LWC13	LWC	159	160	187	189	157	159	248	248	239	270	98	98	107	107	232	232	165	165	293	293	202	202	130	130	232	232	169	182	151	159	142	142	270	273	145	145	237	237	256	262	210	212	109	109	265	298
LWC14	LWC	159	159	187	189	157	157	248	248	239	270	92	98	107	107	232	234	163	165	293	293	195	202	130	133	226	232	169	175	151	151	142	142	270	273	0	0	237	237	262	262	210	210	109	109	265	298
LWC15	LWC	159	159	187	187	157	157	248	248	239	239	92	98	107	107	232	232	163	165	293	293	195	202	124	130	232	232	169	169	151	151	142	142	273	273	0	0	237	237	256	262	210	210	109	109	261	274
LWC16	LWC	159	159	187	187	157	157	248	248	239	270	92	92	107	107	232	232	165	165	293	293	195	202	130	130	228	232	169	182	151	159	142	142	270	275	145	145	237	237	256	262	210	210	109	109	265	298
LWC17	LWC	159	160	187	189	157	159	248	248	247	270	98	98	107	107	232	232	165	165	293	330	202	202	130	130	232	232	169	182	151	159	142	142	271	275	142	145	237	237	262	262	210	210	109	109	265	298
LWC18	LWC	159	159	187	189	157	157	248	248	239	239	98	98	107	107	232	232	163	165	293	293	195	202	124	130	232	232	169	169	151	151	142	142	270	275	123	123	237	237	256	262	210	210	109	109	261	274
LWC19	LWC	159	159	187	187	157	157	248	248	247	270	92	98	107	107	232	232	165	165	293	293	202	202	130	130	232	234	169	169	151	151	142	142	271	275	145	145	237	237	256	262	210	212	109	109	265	298
LWC20	LWC	159	159	187	189	157	157	248	248	239	270	92	98	107	107	232	232	163	165	293	293	191	202	124	130	228	232	169	169	151	151	142	142	273	273	145	145	237	237	256	262	210	210	109	109	265	298
LWC21	LWC	159	160	187	189	157	159	248	248	239	270	98	98	107	107	232	232	165	165	313	330	195	202	130	130	232	232	169	175	151	159	142	142	271	275	143	143	237	237	256	256	210	212	109	109	265	274
LWC22	LWC	159	160	187	189	157	157	248	248	239	270	92	98	107	107	232	232	165	165	293	330	202	202	130	130	232	234	169	182	151	151	142	142	271	273	143	143	237	237	256	262	210	210	109	109	265	298
LWC23	LWC	159	159	187	189	157	159	248	248	239	270	92	98	107	107	232	234	165	165	293	313	202	202	130	130	226	232	175	182	151	151	142	142	273	273	142	142	237	237	262	262	210	210	109	109	265	298
LWC24	LWC	159	160	187	187	157	159	248	248	239	270	92	98	107	107	232	232	163	165	293	293	195	202	130	130	232	232	169	175	151	159	142	142	271	275	143	143	237	237	256	256	210	210	109	109	265	298
LWC25	LWC	159	160	187	189	157	157	248	248	239	270	98	98	107	107	232	234	163	165	293	293	195	202	130	130	232	232	169	169	151	151	142	142	270	271	143	143	237	237	256	262	210	210	109	109	265	298
LWC26	LWC	159	159	189	189	159	159	248	248	270	270	98	98	107	107	232	232	163	165	293	293	195	202	130	130	226	232	169	182	151	151	142	142	273	275	143	143	237	237	262	262	210	210	109	109	261	274
LWC27	LWC	159	159	187	187	157	157	248	248	239	270	92	98	107	107	232	234	163	165	293	313	195	202	124	130	232	232	169	169	151	151	142	142	273	273	0	0	237	237	256	262	210	210	109	109	261	274
LWC28	LWC	159	159	187	189	157	157	248	248	239	270	92	98	107	107	232	232	163	165	293	293	195	202	130	130	232	232	169	182	151	151	142	142	270	273	143	143	237	237	256	262	210	210	109	109	261	274
LWC29	LWC	159	159	187	189	157	157	248	248	239	270	92	98	107	107	232	234	163	163	293	293	195	202	124	130	232	232	169	175	151	151	142	142	270	273	0	0	237	237	256	262	210	210	109	109	261	274
LWC30	LWC	159	160	187	189	157	157	248	248	247	270	98	98	107	107	232	232	165	165	293	293	191	202	124	130	232	232	169	182	151	159	142	142	270	275	143	143	237	237	256	262	210	212	109	109	265	298
LWC31	LWC	159	159	187	189	157	157	248	248	247	270	98	98	107	107	232	232	165	165	293	293	191	202	130	130	232	232	169	169	151	151	142	142	270	275	145	145	237	237	256	262	210	212	109	109	265	298
LWC32	LWC	159	160	187	189	157	157	248	248	247	270	92	92	0	0	232	234	163	165	293	293	191	202	124	130	228	232	169	182	151	151	142	142	271	273	145	145	237	237	262	262	210	210	109	109	265	298
LWC33	LWC	159	159	187	189	157	159	248	248	239	239	98	98	107	107	234	234	163	165	293	293	195	202	130	130	232	232	169	169	151	151	142	142	270	275	0	0	237	237	262	262	210	210	109	109	265	298
LWC34	LWC	159	159	189	189	157	157	248	248	270	270	92	98	107	107	232	234	163	165	293	313	195	202	124	130	232	232	175	182	151	151	142	142	273	275	143	143	237	237	256	262	210	210	109	109	261	274
LWC35	LWC	159	159	187	189	159	159	248	248	270	270	98	98	107	107	234	234	165	165	293	313	202	202	130	130	232	232	175	175	151	151	142	142	273	275	0	0	237	237	262	262	210	210	109	109	261	298
LWC36	LWC	159	159	187	189	157	157	248	248	239	239	92	92	107	107	232	234	163	165	293	293	195	202	130	133	232	232	175	182	151	161	142	142	273	273	142	142	237	237	262	262	210	210	109	109	265	298
LWC37	LWC	159	159	187	187	157	159	248	248	270	270	98	98	107	107	232	234	165	165	293	313	195	195	130	130	226	232	169	169	151	151	142	142	275	275	143	143	237	237	256	262	210	210	109	109	265	298
LWC38	LWC	159	160	187	189	157	157	248	248	239	270	92	98	107	107	232	232	163	165	293	293	191	202	124	130	232	232	169	169	151	151	142	142	273	273	145	145	237	237	256	262	210	210	109	109	265	298
LWC39	LWC	159	159	187	187	157	157	248	248	239	270	92	92	107	107	232	232	163	165	293	330	195	195	130	130	232	232	169	182	151	159	142	142	271	275	143	143	237	237	256	262	210	212	109	109	265	274
LWC40	LWC	159	159	187	187	157	159	248	248	270	270	92	92	107	128	232	234	165	165	293	330	195	195	124	130	226	232	169	182	151	151	142	142	273	275	142	142	237	237	256	256	210	210	109	109	265	298
Quv1	Quv	159	159	189	189	157	157	248	248	239	239	92	92	107	107	234	234	163	163	317	317	195	195	130	130	234	234	173	182	147	147	142	142	275	275	142	142	237	237	256	256	212	212	109	109	259	267
Quv2	Quv	159	159	189	189	157	157	248	248	239	239	92	92	107	107	234	234	163	163	317	317	195	195	130	130	234	234	173	182	147	151	142	142	275	275	142	142	237	237	256	264	212	212	109	109	259	267
Quv3	Quv	159	159	189	189	157	157	248	248	239	239	92	92	107	107	234	234	163	163	317	317	195	195	130	130	228	234	173	173	147	147	142	142	275	275	142	142	237	237	264	264	212	212	109	109	267	267
Quv4	Quv	159	159	189	189	157	157	248	248	239	239	92	92	107	107	234	234	163	163	317	317	195	204	130	130	228	234	173	182	147	147	142	142	275	275	142	142	237	237	256	256	212	212	109	109	259	267
Quv5	Quv	159	159	189	189	157	157	248	248	239	239	92	92	107	107	234	234	161	161	317	330	195	204	130	130	234	234	173	182	147	147	142	142	275	275	142	142	237	237	264	264	212	212	109	109	259	267
Quv6	Quv	159	159	187	189	157	157	248	248	239	239	92	92	107	107	234	234	161	161	317	330	195	204	130	130	228	228	173	182	147	151	142	142	275	275	142	142	237	237	256	256	212	212	109	109	267	267
Quv7	Quv	159	159	189	189	157	159	248	248	239	239	92	92	107	107	234	234	161	161	317	330	195	204	130	130	232	234	173	182	147	150	142	142	275	276	142	142	237	237	264	264	212	212	109	109	267	267
Quv8	Quv	159	159	189	189	157	157	248	248	239	270	92	92	107	107	234	234	161	163	317	317	195	204	130	130	234	234	173	182	147	147	142	142	275	275	142	142	237	237	264	264	212	212	109	109	267	267
Quv9	Quv	159	159	189	189	157	157	248	248	239	239	92	92	107	107	234	234	161	161	317	330	195	204	130	130	232	234	173	182	147	150	142	142	275	276	142	142	237	237	256	264	212	212	109	109	259	267
Quv10	Quv	159	159	187	189	157	157	248	248	239	239	92	92	107	107	234	234	161	163	317	330	195	195	130	130	228	232	182	182	147	147	142	142	275	275	142	142	237	237	256	256	212	212	109	109	259	267
Quv11	Quv	159	159	187	189	157	157	248	248	239	239	92	92	107	107	234	234	161	161	317	330	195	204	130	130	228	234	173	182	147	151	142	142	275	275	142	142	237	237	256	264	212	212	109	109	267	267
Quv12	Quv	159	159	187	189	157	157	248	248	239	270	92	92	107	107	234	234	161	161	317	330	195	195	130	130	228	234	173	182	147	147	142	142	275	275	142	142	237	237	256	256	212	212	109	109	267	267
Quv13	Quv	159	159	187	189	157	157	248	248	239	239	92	92	107	107	234	234	161	163	317	330	195	195	130	130	232	234	173	182	147	151	142	142	275	275	142	142	237	237	256	264	212	212	109	109	259	267
Quv14	Quv	159	159	187	189	157	157	248	248	239	247	92	92	107	128	234	234	163	165	317	330	195	195	130	130	234	234	169	169	151	151	142	142	271	271	142	142	237	237	256	262	212	212	109	109	265	267
Quv15	Quv	159	160	187	187	157	159	248	248	247	270	92	92	107	128	232	234	165	165	293	330	195	195	124	130	234	234	169	169	151	151	142	142	271	271	145	145	237	237	262	262	210	212	109	109	265	274
Quv16	Quv	159	159	187	189	157	157	248	248	239	239	92	92	107	107	234	234	161	163	330	330	195	195	130	130	228	228	182	182	147	147	142	142	275	275	142	142	237	237	256	256	212	212	109	109	259	268
Quv17	Quv	159	159	187	189	157	157	248	248	239	239	92	92	107	107	234	234	161	163	317	317	195	204	130	130	228	234	173	182	147	151	142	142	275	275	142	142	237	237	256	264	212	212	109	109	259	268
Quv18	Quv	159	159	189	189	157	157	248	248	239	239	92	92	107	107	234	234	161	163	317	330	195	204	130	130	232	234	173	182	147	147	142	142	275	275	142	142	237	237	256	256	212	212	109	109	259	267
Quv19	Quv	159	159	187	189	157	157	248	248	239	270	92	92	107	107	234	234	161	161	317	317	195	204	130	130	232	234	173	182	147	150	142	142	275	275	142	142	237	237	256	256	212	212	109	109	259	267
Quv20	Quv	159	159	189	189	157	157	248	248	239	270	92	92	107	107	234	234	163	163	317	317	195	195	130	130	234	234	182	182	147	151	142	142	275	275	142	142	237	237	256	264	212	212	109	109	267	267
Quv21	Quv	159	159	189	189	157	157	248	248	270	270	92	92	107	107	234	234	161	163	317	317	195	204	130	130	228	232	173	173	147	151	142	142	275	275	142	142	237	237	256	256	212	212	109	109	259	267
Quv22	Quv	159	159	187	189	157	157	248	248	239	270	92	92	107	107	234	234	163	163	317	317	204	204	130	130	232	234	173	182	147	150	142	142	275	275	142	142	237	237	256	256	212	212	109	109	259	267
Quv23	Quv	159	159	189	189	157	157	248	248	239	239	92	92	107	107	230	230	163	163	317	317	195	195	130	130	232	234	173	182	147	151	142	142	275	275	142	142	237	237	256	264	212	212	109	109	267	267
Quv24	Quv	159	159	189	189	157	157	248	248	239	270	92	92	107	107	234	234	161	163	317	330	195	195	130	130	228	232	173	182	147	151	142	142	275	275	142	142	237	237	256	256	212	212	109	109	259	267
Quv25	Quv	159	159	189	189	157	157	248	248	239	239	92	92	107	107	234	234	161	163	317	317	195	195	130	130	234	234	173	173	147	151	142	142	275	275	142	142	237	237	256	256	212	212	109	109	259	267
Quv26	Quv	159	159	187	189	157	157	248	248	270	270	92	92	107	107	234	234	161	163	330	330	195	204	130	130	228	234	173	173	147	151	142	142	275	275	142	142	237	237	256	256	212	212	109	109	259	267
Quv27	Quv	159	159	189	189	157	157	248	248	239	239	92	92	107	107	234	234	161	161	317	317	195	204	130	130	228	228	173	182	147	147	142	142	275	275	142	142	237	237	256	264	212	212	109	109	259	267
Quv28	Quv	159	159	189	189	157	157	248	248	239	239	92	92	107	107	234	234	161	161	330	330	195	195	130	130	228	228	182	182	147	147	142	142	275	275	142	142	237	237	256	256	212	212	109	109	267	267
Quv29	Quv	159	159	187	189	157	157	248	248	239	239	92	92	107	107	234	234	161	163	317	330	195	195	130	130	228	228	182	182	147	147	142	142	275	275	142	142	237	237	256	256	212	212	109	109	259	267
Quv30	Quv	159	159	189	189	157	157	248	248	239	270	92	92	107	107	234	234	161	163	317	330	204	204	130	130	232	232	173	173	147	151	142	142	275	275	142	142	237	237	256	256	212	212	109	109	259	267
Quv31	Quv	159	159	189	189	157	157	248	248	239	239	92	92	107	107	234	234	161	161	317	330	195	204	130	130	228	232	173	182	147	150	142	142	275	275	142	142	237	237	256	256	212	212	109	109	259	267
Quv32	Quv	159	159	187	189	157	157	248	248	239	239	92	92	107	107	234	234	161	163	317	330	195	204	130	130	228	228	182	182	147	147	142	142	275	275	142	142	237	237	256	256	212	212	109	109	267	296
Quv33	Quv	159	159	189	189	157	157	248	248	239	239	92	92	107	107	234	234	161	163	317	330	195	195	130	130	228	234	182	182	147	151	142	142	275	275	142	142	237	237	256	264	212	212	109	109	259	296
Quv34	Quv	159	159	187	189	157	157	248	248	239	239	92	92	107	107	234	234	161	161	330	330	195	195	130	130	228	234	182	182	147	151	142	142	275	275	142	142	237	237	256	264	212	212	109	109	259	267
Quv35	Quv	159	159	187	189	157	157	248	248	239	270	92	92	107	107	234	234	161	161	317	330	195	204	130	130	232	234	182	182	147	147	142	142	271	275	142	142	237	237	256	264	212	212	109	109	259	267
Quv36	Quv	159	159	187	189	157	157	248	248	239	270	92	92	107	107	234	234	161	163	317	317	195	195	130	130	234	234	173	182	147	147	142	142	271	275	142	142	237	237	264	264	212	212	109	109	267	267
Quv37	Quv	159	159	187	189	157	157	248	248	239	239	92	92	107	107	234	234	161	161	317	330	195	204	130	130	228	228	173	182	147	147	142	142	275	275	142	142	237	237	256	256	212	212	109	109	259	267
Quv38	Quv	159	159	189	189	157	157	248	248	239	270	92	92	107	107	234	234	161	161	317	317	195	195	130	130	234	234	182	182	147	147	142	142	275	275	142	142	237	237	256	264	212	212	109	109	267	267
Quv39	Quv	159	159	187	189	157	159	248	248	247	270	92	92	128	128	234	234	163	165	293	330	195	195	124	130	234	234	169	169	151	151	142	142	271	271	0	0	237	237	256	262	212	212	109	109	265	274
Quv40	Quv	159	160	187	189	157	157	248	248	239	239	92	92	107	107	232	234	163	165	293	293	195	195	130	130	234	234	169	169	151	151	142	142	271	271	145	145	237	237	256	262	210	212	109	109	265	274
RWNE1	RWNE	159	159	187	187	157	157	248	248	239	239	92	98	107	107	232	234	163	163	301	301	195	195	130	130	232	234	186	186	151	151	142	156	276	276	142	142	237	237	262	262	212	212	109	109	265	274
RWNE2	RWNE	159	159	187	187	157	157	248	248	247	247	92	98	107	107	232	234	163	163	293	293	195	195	130	130	234	234	186	186	151	151	142	156	276	276	142	142	237	237	262	262	212	212	109	109	265	274
RWNE3	RWNE	159	159	187	187	157	157	248	248	247	247	92	92	128	128	232	232	163	163	293	293	195	195	130	130	232	234	186	186	151	151	156	156	276	276	142	142	237	237	262	262	212	212	109	109	265	274
RWNE4	RWNE	159	159	187	187	157	157	248	248	247	247	92	92	107	128	232	234	163	163	301	301	195	195	130	130	234	234	186	186	151	151	142	156	276	276	142	142	237	237	262	262	212	212	109	109	265	274
RWNE5	RWNE	159	159	187	187	157	157	248	248	247	247	92	98	107	128	232	232	163	163	293	293	195	195	118	130	232	234	186	186	151	151	142	142	276	276	142	142	237	237	262	262	212	212	109	109	265	274
RWNE6	RWNE	159	159	187	189	157	157	248	248	239	247	92	98	107	107	232	234	163	163	293	301	195	195	118	130	234	234	186	186	151	151	156	156	276	276	142	142	237	237	262	262	212	212	109	109	265	274
RWNE7	RWNE	159	159	187	189	157	157	248	248	239	247	92	98	107	107	232	234	163	163	293	301	195	195	130	130	234	234	186	186	151	151	156	156	276	276	142	142	237	237	262	262	212	212	109	109	265	274
RWNE8	RWNE	159	159	187	187	157	157	248	248	239	247	92	98	107	107	232	234	163	163	293	301	195	195	118	130	232	234	186	186	151	151	142	156	276	276	142	142	237	237	262	262	212	212	109	109	265	274
RWNE9	RWNE	159	159	187	189	157	157	248	248	239	247	92	98	107	107	232	232	163	163	301	301	195	195	118	130	234	234	186	186	151	151	142	156	271	276	0	0	237	237	262	262	212	212	109	109	265	274
RWNE10	RWNE	159	159	187	189	157	157	248	248	239	247	92	98	107	107	234	234	163	163	301	301	195	195	130	130	234	234	186	186	151	151	142	156	276	276	142	142	237	237	262	262	212	212	109	109	265	274
RWNE11	RWNE	159	159	187	187	157	157	248	248	239	239	92	92	107	107	232	232	163	163	301	301	195	195	130	130	234	234	186	186	151	151	142	156	276	276	142	142	237	237	262	262	212	212	109	109	288	298
RWNE12	RWNE	159	159	187	187	157	157	248	248	239	247	92	92	107	128	232	232	163	163	293	301	195	195	118	118	234	234	186	186	151	151	142	156	276	276	142	142	237	237	262	262	212	212	109	109	265	298
RWNE13	RWNE	159	159	187	187	157	157	248	248	239	247	92	92	128	128	232	234	163	163	293	293	195	195	118	118	234	234	186	186	151	151	142	156	276	276	142	142	237	237	262	262	212	212	109	109	265	274
RWNE14	RWNE	159	159	187	189	157	157	248	248	239	247	92	98	107	128	232	234	163	163	293	301	195	195	118	130	234	234	186	186	151	151	142	156	276	276	142	142	237	237	262	262	212	212	109	109	265	298
RWNE15	RWNE	159	159	187	187	157	157	248	248	239	247	98	98	128	128	232	232	163	163	293	301	195	195	118	130	234	234	186	186	151	151	142	156	271	276	142	142	237	237	262	262	212	212	109	109	265	274
RWNE16	RWNE	159	159	187	189	157	157	248	248	239	247	92	98	107	107	232	234	163	163	293	301	195	195	130	130	234	234	186	186	151	151	156	156	276	276	142	142	237	237	262	262	212	212	109	109	265	298
RWNE17	RWNE	159	159	187	187	157	157	248	248	247	247	98	98	107	128	232	232	163	163	293	293	195	195	130	130	232	234	186	186	151	151	142	142	276	276	142	142	237	237	262	262	212	212	109	109	265	274
RWNE18	RWNE	159	159	187	189	157	157	248	248	239	247	92	98	128	128	232	232	163	163	301	301	195	195	118	130	234	234	186	186	151	151	142	156	276	276	142	142	237	237	256	262	212	212	109	109	265	274
RWNE19	RWNE	159	159	187	187	157	157	248	248	239	247	92	98	107	128	232	232	163	163	293	293	195	195	118	130	234	234	186	186	151	151	142	156	276	276	142	142	237	237	256	262	212	212	109	109	265	298
RWNE20	RWNE	159	159	187	187	157	157	248	248	239	247	98	98	107	128	232	232	163	163	293	301	195	195	118	130	234	234	186	186	151	151	156	156	276	276	142	142	237	237	262	262	212	212	109	109	265	274
RWNE21	RWNE	159	159	187	187	157	157	248	248	247	247	92	92	107	128	232	234	163	163	293	301	195	195	118	130	234	234	186	186	151	151	156	156	276	276	142	142	237	237	262	262	212	212	109	109	265	274
RWNE22	RWNE	159	159	187	189	157	157	248	248	239	247	98	98	107	128	232	234	163	163	301	301	195	195	130	130	234	234	186	186	151	151	142	142	271	276	142	142	237	237	262	262	212	212	109	109	265	274
RWNE23	RWNE	159	159	187	189	157	157	248	248	247	247	98	98	107	128	232	232	163	163	301	301	195	195	118	130	234	234	186	186	151	151	142	156	276	276	142	142	237	237	262	262	212	212	109	109	265	274
RWNE24	RWNE	159	159	187	187	157	157	248	248	247	247	92	98	107	107	232	232	163	163	301	301	195	195	118	130	234	234	186	186	151	151	142	156	276	276	142	142	237	237	262	262	212	212	109	109	265	274
RWNE25	RWNE	159	159	187	187	157	157	248	248	247	247	92	92	107	107	234	234	163	163	301	301	195	195	130	130	234	234	186	186	151	151	156	156	276	276	142	142	237	237	262	262	212	212	109	109	265	298
RWNE26	RWNE	159	159	187	189	157	157	248	248	239	247	92	92	128	128	232	234	163	163	293	293	195	195	118	130	234	234	186	186	151	151	142	156	276	276	142	142	237	237	262	262	212	212	109	109	265	274
RWNE27	RWNE	159	159	187	189	157	157	248	248	239	247	92	92	107	128	232	234	163	163	293	293	195	195	118	130	234	234	186	186	151	151	142	156	276	276	142	142	237	237	262	262	212	212	109	109	265	274
RWNE28	RWNE	159	159	187	187	157	157	248	248	239	247	92	98	128	128	232	232	163	163	293	293	195	195	118	130	234	234	186	186	151	151	142	142	271	276	142	142	237	237	256	262	212	212	109	109	288	298
RWNE29	RWNE	159	159	187	187	157	157	248	248	239	247	98	98	107	128	232	234	163	163	293	301	195	195	118	130	234	234	186	186	151	151	142	156	276	276	142	142	237	237	262	262	212	212	109	109	265	274
RWNE30	RWNE	159	159	187	187	157	157	248	248	247	247	98	98	128	128	232	232	163	163	293	293	195	195	130	130	232	234	186	186	151	151	142	156	276	276	142	142	237	237	262	262	212	212	109	109	265	274
RWNE31	RWNE	159	159	187	189	157	157	248	248	247	247	92	98	107	107	234	234	163	163	293	293	195	195	130	130	232	234	186	186	151	151	142	156	276	276	142	142	237	237	262	262	212	212	109	109	265	298
RWNE32	RWNE	159	159	187	187	157	157	248	248	239	247	98	98	107	128	232	232	163	163	293	301	195	195	118	118	234	234	186	186	151	151	142	142	276	276	142	142	237	237	262	262	212	212	109	109	265	274
RWNE33	RWNE	159	159	187	189	157	157	248	248	239	247	92	98	107	128	232	234	163	163	301	301	195	195	118	130	234	234	186	186	151	151	156	156	276	276	142	142	237	237	262	262	212	212	109	109	265	298
RWNE34	RWNE	159	159	189	189	157	157	248	248	239	247	98	98	107	128	232	234	163	163	293	293	195	195	130	130	234	234	186	186	151	151	142	156	276	276	142	142	237	237	262	262	212	212	109	109	265	274
RWNE35	RWNE	159	159	187	187	157	157	248	248	239	247	92	98	107	128	232	232	163	163	293	301	195	195	130	130	234	234	186	186	151	151	142	156	276	276	142	142	237	237	262	262	212	212	109	109	265	274
RWNE36	RWNE	159	159	189	189	157	157	248	248	247	247	92	92	107	107	232	234	163	163	301	301	195	195	130	130	234	234	186	186	151	151	142	156	271	276	142	142	237	237	262	262	212	212	109	109	265	298
RWNE37	RWNE	159	159	187	189	157	157	248	248	247	247	92	92	107	128	232	234	163	163	293	301	195	195	118	130	234	234	186	186	151	151	142	156	276	276	142	142	237	237	262	262	212	212	109	109	265	298
RWNE38	RWNE	159	159	187	189	157	157	248	248	247	247	92	98	107	128	232	234	163	163	293	293	195	195	118	130	234	234	186	186	151	151	142	156	276	276	142	142	237	237	262	262	212	212	109	109	265	298
RWNE39	RWNE	159	159	187	187	157	157	248	248	247	247	92	98	107	107	232	234	163	163	293	301	195	195	130	130	234	234	186	186	151	151	142	156	276	276	142	142	237	237	262	262	212	212	109	109	265	274
RWNE40	RWNE	159	159	187	189	157	157	248	248	239	239	92	92	128	128	232	232	163	163	301	301	195	195	118	130	234	234	186	186	151	151	142	156	276	276	142	142	237	237	262	262	212	212	109	109	265	274
WE1	WE	159	159	189	189	157	157	248	248	239	270	92	92	107	107	232	234	163	163	317	317	195	195	124	130	228	234	169	173	151	151	142	142	270	270	145	145	237	237	256	262	212	212	109	109	265	267
WE2	WE	159	159	187	189	157	157	248	248	239	239	102	102	107	107	234	234	163	165	317	330	191	202	130	130	232	232	169	173	151	151	142	142	271	276	145	145	237	237	256	256	212	212	109	109	265	267
WE3	WE	159	159	187	189	157	157	248	248	239	270	92	96	107	107	232	234	163	163	317	330	191	191	124	130	234	234	182	182	147	151	142	142	270	276	142	142	237	237	256	256	212	212	109	109	265	274
WE4	WE	159	159	187	189	157	157	248	248	239	270	92	102	107	107	232	232	165	165	293	330	202	202	124	130	234	234	169	182	151	151	142	142	273	276	145	145	237	237	256	262	212	212	109	109	265	267
WE5	WE	159	160	187	191	157	157	248	248	239	247	98	98	107	107	232	234	163	165	293	330	191	191	124	130	234	234	169	173	151	151	142	142	270	276	145	145	237	237	256	256	212	212	109	109	265	274
WE6	WE	159	159	187	189	157	157	248	248	239	239	92	102	107	107	232	234	163	165	317	330	195	202	124	130	228	234	169	182	151	151	142	142	271	276	145	145	237	237	256	256	212	212	109	109	267	296
WE7	WE	159	159	189	189	157	157	248	248	247	247	92	102	107	128	234	234	165	165	317	330	191	202	124	130	234	234	169	169	147	151	142	142	270	276	123	123	237	237	256	262	212	212	109	109	265	274
WE8	WE	159	160	187	191	157	157	248	248	239	247	102	102	107	107	234	234	163	165	317	330	195	195	130	130	234	234	169	169	151	151	142	142	275	275	142	142	237	237	256	262	212	212	109	109	265	296
WE9	WE	159	160	187	191	157	159	248	254	239	239	92	92	107	107	234	234	163	165	293	317	191	202	130	130	234	234	169	173	151	151	142	142	270	275	145	145	237	237	256	262	212	212	109	109	267	298
WE10	WE	159	159	187	189	152	157	248	248	239	247	96	102	107	107	232	234	163	165	317	330	191	202	124	124	232	232	169	182	151	161	142	142	271	275	145	145	237	237	256	262	212	212	109	109	265	274
WE11	WE	159	160	187	191	157	157	248	248	239	247	102	102	107	107	232	232	163	163	317	330	191	195	130	130	234	234	169	182	151	151	142	142	270	271	0	0	237	237	256	262	212	212	109	109	265	298
WE12	WE	159	159	189	191	157	157	248	248	239	239	92	102	107	107	232	234	165	165	317	317	191	195	124	130	228	232	169	182	151	151	142	142	271	275	142	142	237	237	256	262	212	212	109	109	265	298
WE13	WE	160	160	191	191	157	157	248	248	239	270	92	92	107	107	232	232	165	165	317	330	195	202	124	124	234	234	169	182	151	151	142	142	270	275	145	145	237	237	256	256	212	212	109	109	265	274
WE14	WE	159	159	189	191	157	157	248	248	239	270	102	102	107	107	232	232	163	163	293	317	195	195	130	130	232	234	169	182	151	151	142	142	270	275	145	145	237	237	256	256	212	212	109	109	265	296
WE15	WE	159	159	187	191	157	157	248	254	247	247	92	92	107	107	234	234	163	165	293	293	191	202	130	130	234	234	169	182	147	151	142	142	270	270	145	145	237	237	256	262	212	212	109	109	265	274
WE16	WE	159	160	189	189	152	157	248	248	239	239	92	102	107	128	234	234	163	165	293	317	191	195	124	124	234	234	169	169	151	161	142	142	270	271	145	145	237	237	256	256	212	212	109	109	267	296
WE17	WE	159	160	189	191	157	159	248	248	239	239	96	102	107	107	232	234	163	165	293	317	191	195	124	124	234	234	169	182	151	151	142	142	270	275	0	0	237	237	256	256	212	212	109	109	265	274
WE18	WE	159	159	187	191	157	157	248	248	239	270	92	98	107	107	232	234	163	165	317	330	195	202	124	130	234	234	169	182	151	151	142	142	273	275	123	145	237	237	256	262	212	212	109	109	265	274
WE19	WE	159	159	187	187	157	157	248	248	239	270	96	102	107	107	234	234	165	165	330	338	191	195	124	130	228	234	169	169	151	151	142	142	270	271	0	0	237	237	256	268	212	212	109	109	265	267
WE20	WE	159	159	187	189	157	159	248	254	247	247	92	92	107	107	232	234	163	165	293	338	195	202	124	130	234	234	169	173	147	151	142	142	270	271	145	145	237	237	256	262	212	212	109	109	267	267
WE21	WE	159	159	189	189	157	157	248	254	247	270	92	96	107	107	232	232	163	165	293	330	195	202	130	130	232	234	169	182	147	161	142	142	275	275	145	145	237	237	256	256	212	212	109	109	265	274
WE22	WE	159	160	189	191	157	157	248	254	239	270	92	92	107	107	234	234	163	165	330	330	202	202	124	130	234	234	169	182	161	161	142	142	270	271	123	123	237	237	256	262	212	212	109	109	267	267
WE23	WE	159	160	189	191	157	157	248	248	247	247	92	92	107	107	232	234	163	165	330	330	191	202	124	130	228	232	169	182	161	161	142	142	270	271	123	123	237	237	256	256	212	212	109	109	265	267
WE24	WE	159	159	187	189	152	157	248	248	239	270	92	102	107	107	234	234	163	165	317	330	191	195	124	130	234	234	169	182	151	161	142	142	270	271	145	145	237	237	256	256	212	212	109	109	267	296
WE25	WE	159	160	187	189	157	157	248	248	239	270	92	92	107	128	232	234	163	165	317	330	195	202	130	130	228	228	169	182	151	151	142	142	276	276	143	145	237	237	256	256	212	212	109	109	265	296
WE26	WE	159	159	189	191	157	157	248	254	247	270	102	102	107	107	232	232	163	165	293	330	191	202	124	130	234	234	169	169	151	151	142	142	270	275	0	0	237	237	256	256	212	212	109	109	265	274
WE27	WE	159	159	189	189	157	157	248	248	239	239	92	96	107	107	234	234	165	165	317	317	202	202	124	130	234	234	169	169	151	151	142	142	275	275	145	145	237	237	256	256	212	212	109	109	265	267
WE28	WE	159	159	189	191	157	157	248	248	247	247	92	92	107	107	234	234	165	165	317	330	195	202	124	130	232	234	169	182	151	151	142	142	270	276	145	145	237	237	256	256	212	212	109	109	265	274
WE29	WE	159	159	189	189	157	157	248	248	239	270	92	92	128	128	234	234	165	165	330	338	195	202	130	130	232	234	169	182	151	151	142	142	270	271	142	142	237	237	256	262	212	212	109	109	265	274
WE30	WE	159	160	187	189	152	159	248	248	239	239	102	102	107	107	232	234	163	165	317	330	195	202	130	130	228	234	169	169	151	161	142	142	270	271	145	145	237	237	256	262	212	212	109	109	265	275
WE31	WE	159	160	187	189	157	157	248	248	239	239	98	102	107	128	232	232	165	165	293	317	191	202	124	130	228	234	169	169	147	151	142	142	275	276	0	0	237	237	256	262	212	212	109	109	265	274
WE32	WE	159	160	187	187	157	157	248	248	239	239	92	92	107	107	232	232	163	165	317	330	195	195	130	130	234	234	173	182	151	151	142	142	270	271	0	0	237	237	256	262	212	212	109	109	267	296
WE33	WE	159	160	187	187	157	157	248	248	239	247	96	102	107	107	232	232	165	165	293	330	195	202	130	130	234	234	169	173	151	151	142	142	271	275	145	145	237	237	256	256	212	212	109	109	265	298
WE34	WE	159	160	187	189	157	157	248	248	239	239	92	102	107	128	234	234	163	165	293	317	191	195	124	124	234	234	169	169	151	151	142	142	270	271	145	145	237	237	256	256	212	212	109	109	267	296
WE35	WE	159	159	191	191	157	157	248	254	239	247	92	102	107	107	234	234	163	165	330	330	195	195	124	124	228	232	169	182	147	151	142	142	270	275	145	145	237	237	256	256	212	212	109	109	265	296
WE36	WE	159	160	187	189	157	157	248	254	239	247	92	92	107	107	232	234	165	165	317	330	191	202	124	130	232	234	169	182	151	161	142	142	271	271	145	145	237	237	256	256	212	212	109	109	267	296
WE37	WE	159	159	187	187	157	157	254	254	247	270	102	102	107	107	232	234	163	165	317	330	195	202	124	130	228	228	169	182	147	147	142	142	270	271	143	143	237	237	256	256	212	212	109	109	265	274
WE38	WE	160	160	187	187	157	157	248	248	247	270	94	94	107	107	234	234	163	163	330	330	202	202	124	130	232	232	169	182	151	151	142	156	270	271	0	0	237	237	256	262	212	212	109	109	265	274
WE39	WE	159	159	187	189	157	157	248	248	239	239	92	102	107	107	232	232	165	165	293	317	191	195	130	130	228	232	169	169	151	151	142	142	270	270	123	123	237	237	256	262	212	212	109	109	265	274
WE40	WE	159	159	187	191	157	157	248	248	239	247	92	92	107	107	234	234	165	165	317	330	191	195	130	130	232	234	169	182	151	151	142	142	270	270	142	142	237	237	256	262	212	212	109	109	265	274
AWE1	AWE	159	163	187	189	157	157	248	248	239	247	92	92	107	107	232	232	165	165	330	332	195	195	130	133	234	234	169	186	147	151	142	142	271	276	142	142	237	237	262	262	210	212	109	109	265	274
AWE2	AWE	159	163	187	189	157	157	248	248	239	239	92	92	107	107	232	232	163	165	330	332	195	195	130	130	228	234	169	169	147	147	142	156	276	276	142	142	237	237	262	262	210	212	109	109	265	274
AWE3	AWE	159	159	187	189	137	157	248	248	247	247	98	98	107	107	232	234	165	165	317	330	195	195	130	130	226	228	169	169	151	151	142	156	270	276	0	0	237	237	256	262	210	212	109	109	261	274
AWE4	AWE	159	163	187	187	157	157	248	248	239	239	94	94	107	107	232	232	165	165	330	332	195	195	130	130	228	234	182	186	147	151	142	156	271	276	142	142	237	237	262	262	210	212	109	109	265	274
AWE5	AWE	159	163	187	187	157	157	248	248	247	247	98	98	107	107	232	232	163	163	317	317	202	202	124	124	251	251	175	182	147	151	142	142	270	271	0	0	237	239	256	262	210	212	109	109	259	274
AWE6	AWE	159	160	187	189	137	157	248	248	247	247	92	92	107	107	232	234	163	165	317	330	195	195	130	130	226	251	169	169	147	151	142	142	270	276	0	0	237	237	256	262	210	212	109	109	259	268
AWE7	AWE	159	159	187	189	157	157	248	248	247	247	98	98	0	0	232	232	163	165	317	317	195	202	124	130	251	251	182	182	151	151	142	142	270	271	0	0	237	237	256	262	212	212	109	109	259	274
AWE8	AWE	159	163	187	189	157	157	248	254	239	247	98	98	107	107	234	234	163	165	330	332	195	195	130	130	234	251	175	186	147	151	142	142	270	271	0	0	237	237	256	256	212	212	109	109	265	274
AWE9	AWE	159	163	189	189	157	157	248	248	247	270	92	98	107	107	232	232	163	165	330	332	195	195	133	133	228	234	169	186	147	151	142	142	271	271	0	0	237	237	256	262	210	210	109	109	265	274
AWE10	AWE	163	163	189	189	157	157	248	248	239	270	94	94	107	107	232	234	163	165	332	332	195	195	124	130	228	234	175	186	147	151	142	142	271	271	0	0	237	237	256	262	210	212	109	109	265	274
AWE11	AWE	159	163	187	187	137	157	248	248	239	247	98	98	107	107	232	232	163	165	330	330	195	195	130	130	226	234	169	182	147	151	142	142	276	276	142	142	237	237	256	262	212	212	109	109	265	274
AWE12	AWE	163	163	187	189	157	157	248	248	239	247	92	92	107	107	232	234	163	165	330	330	195	195	124	130	228	234	169	186	151	151	142	142	271	276	142	142	237	239	256	262	210	212	109	109	265	274
AWE13	AWE	159	160	187	189	157	157	248	254	247	270	98	98	107	107	234	234	163	165	330	332	195	195	124	130	228	251	169	169	147	147	142	142	275	275	142	142	237	237	256	262	210	212	109	109	259	274
AWE14	AWE	159	163	187	187	157	157	248	248	239	270	98	98	107	107	232	232	165	165	330	332	195	195	133	133	228	234	175	186	147	151	142	142	271	271	0	0	237	237	256	262	210	212	109	109	265	274
AWE15	AWE	159	163	187	189	157	157	248	248	247	270	98	98	107	107	232	232	163	163	330	330	195	195	124	133	234	251	169	186	147	151	142	142	270	271	142	142	237	237	256	262	210	212	109	109	261	274
AWE16	AWE	160	163	187	189	157	157	248	248	247	247	98	98	107	107	232	234	163	165	330	332	195	195	130	130	251	251	169	169	147	151	142	142	271	275	0	0	237	239	256	262	210	212	109	109	259	270
AWE17	AWE	159	163	187	189	157	157	248	254	239	247	98	98	107	107	232	234	163	163	332	332	202	202	130	130	228	251	169	186	147	151	142	156	270	275	142	142	237	237	256	262	210	212	109	109	265	274
AWE18	AWE	163	163	187	187	157	157	248	248	247	270	92	98	107	107	232	234	163	165	330	332	195	202	124	133	226	234	169	186	147	151	156	156	270	276	142	142	237	237	256	256	210	212	109	109	265	274
AWE19	AWE	159	163	187	187	137	157	248	248	247	270	92	92	107	107	232	232	165	165	317	330	195	195	130	130	226	234	169	186	151	151	142	156	270	270	142	142	237	237	262	262	212	212	109	109	265	274
AWE20	AWE	159	159	187	189	157	157	248	248	239	247	98	98	107	107	234	234	163	165	330	332	195	202	130	130	228	228	169	186	147	151	142	156	270	276	0	0	237	237	256	262	212	212	109	109	265	274
AWE21	AWE	160	163	187	187	157	157	248	248	247	247	98	98	107	107	232	232	163	165	330	330	195	195	124	124	228	251	169	169	147	151	142	142	271	275	142	142	237	237	256	256	210	212	109	109	259	270
AWE22	AWE	159	163	187	189	157	157	248	254	239	270	98	98	107	107	232	234	163	163	332	332	195	202	130	130	228	251	175	186	147	151	142	142	270	276	142	142	237	237	256	256	210	212	109	109	265	274
AWE23	AWE	159	160	189	189	137	157	248	248	247	270	92	98	107	107	232	234	163	165	330	330	195	195	124	124	228	251	169	182	147	151	142	142	271	275	142	142	237	237	256	262	210	210	109	109	259	274
AWE24	AWE	159	163	189	189	157	157	248	248	247	247	98	98	107	107	232	234	165	165	317	330	195	202	124	130	228	234	182	186	151	151	142	142	270	276	0	0	237	237	256	256	212	212	109	109	265	274
AWE25	AWE	159	163	187	189	137	157	248	248	247	247	92	98	107	107	232	234	165	165	317	330	195	195	124	130	226	228	169	182	147	151	142	142	270	270	0	0	237	237	256	256	212	212	109	109	259	274
AWE26	AWE	163	163	187	187	157	157	248	248	239	247	92	92	107	107	232	232	163	163	330	332	195	195	130	133	234	234	182	186	147	151	142	156	270	271	142	142	237	237	262	262	210	212	109	109	265	274
AWE27	AWE	159	163	187	189	157	157	248	248	239	247	98	98	107	107	232	232	163	163	317	330	195	195	124	130	251	251	182	186	147	151	142	142	270	270	142	142	237	237	262	262	210	212	109	109	265	274
AWE28	AWE	160	160	187	189	157	157	248	248	239	247	94	94	107	107	232	232	163	163	317	332	195	195	124	130	226	251	169	182	151	151	142	142	275	275	0	0	237	237	256	262	210	212	109	109	259	274
AWE29	AWE	160	160	187	189	157	157	248	248	239	247	98	98	107	107	232	234	163	165	317	317	195	202	130	130	228	228	173	173	151	151	142	156	270	271	0	0	237	237	256	262	210	212	109	109	265	274
AWE30	AWE	159	163	189	189	157	157	248	248	239	247	98	102	107	107	232	232	165	165	317	330	195	195	124	130	228	251	169	186	147	151	142	142	270	276	142	142	237	237	256	262	210	212	109	109	265	274
AWE31	AWE	159	163	187	189	137	157	248	248	239	247	92	98	107	107	232	232	163	165	317	330	195	195	124	130	234	251	182	182	147	151	142	142	270	275	0	0	237	237	256	256	210	212	109	109	265	274
AWE32	AWE	159	163	187	189	157	157	248	248	247	270	98	98	107	107	232	234	163	165	330	332	195	195	124	133	228	251	169	175	151	151	142	142	271	271	0	0	237	239	256	256	210	212	109	109	259	274
AWE33	AWE	163	163	187	189	157	157	248	254	239	270	92	98	107	107	232	232	165	165	330	330	195	195	130	133	228	234	169	186	151	151	142	156	270	270	142	142	237	237	256	262	210	212	109	109	265	274
AWE34	AWE	160	160	187	187	137	157	248	248	239	247	98	98	107	107	234	234	165	165	330	330	195	195	130	130	226	228	169	169	147	151	142	142	270	271	0	0	237	237	256	262	210	210	109	109	265	274
AWE35	AWE	159	163	187	187	157	157	248	254	239	247	98	98	107	107	232	234	163	165	317	330	195	202	124	130	251	251	169	175	147	151	142	142	271	271	142	142	237	237	262	262	210	212	109	109	259	274
AWE36	AWE	159	163	189	189	157	157	248	248	239	247	98	98	107	107	232	232	163	165	317	330	195	202	124	130	251	251	169	186	147	151	142	142	270	276	142	142	237	237	256	256	212	212	109	109	265	274
AWE37	AWE	159	163	187	187	157	157	248	248	247	270	98	98	107	107	232	234	163	163	317	332	195	202	124	130	226	251	175	186	147	151	142	156	270	275	142	142	237	237	256	256	210	212	109	109	265	274
AWE38	AWE	159	163	187	189	157	157	248	248	247	270	92	92	107	107	232	234	165	165	330	330	195	195	130	130	228	251	169	182	147	151	142	142	270	275	142	142	237	237	256	262	212	212	109	109	259	274
AWE39	AWE	159	163	187	187	157	157	248	248	247	247	98	98	107	107	232	234	163	165	330	330	202	202	130	130	251	251	169	175	147	151	142	142	270	271	142	142	239	239	256	262	212	212	109	109	265	274
AWE40	AWE	159	163	187	187	157	157	248	248	247	270	92	92	107	107	232	232	163	165	330	330	195	195	130	133	234	251	169	186	147	151	142	142	270	271	142	142	237	237	262	262	212	212	109	109	265	274
AMRP1	AMRP	159	159	189	189	157	157	248	248	270	270	92	92	107	107	232	234	163	163	330	330	191	191	118	118	226	226	182	182	150	150	142	142	276	276	123	123	237	237	262	262	212	212	109	109	265	298
AMRP2	AMRP	159	159	189	189	157	157	248	248	270	270	92	98	107	107	232	234	163	163	330	330	191	191	118	124	226	234	182	186	150	159	142	142	276	276	123	123	237	237	256	262	212	212	109	109	288	298
AMRP3	AMRP	159	160	189	189	157	157	248	248	270	270	92	98	107	107	232	234	163	163	330	330	191	195	118	124	234	234	182	182	150	159	142	142	271	276	123	123	237	237	262	262	212	212	109	109	288	298
AMRP4	AMRP	159	159	189	189	157	157	248	248	270	270	92	92	107	107	234	234	163	163	330	330	191	191	118	118	226	226	182	186	150	150	142	142	276	276	123	123	237	237	262	262	212	212	109	109	288	298
AMRP5	AMRP	159	160	189	189	157	157	248	248	270	270	92	98	107	107	232	232	163	163	317	330	191	191	118	124	234	234	182	186	150	159	142	142	276	276	123	123	237	237	262	262	212	212	109	109	288	298
AMRP6	AMRP	159	159	189	189	157	157	248	248	270	270	98	98	107	107	232	234	163	163	330	330	195	195	118	124	234	234	182	182	150	159	142	142	271	276	123	123	237	237	262	262	212	212	109	109	288	298
AMRP7	AMRP	159	159	189	189	157	157	248	248	270	270	92	92	107	107	234	234	163	163	330	330	191	191	118	118	226	234	182	186	150	150	142	142	276	276	123	123	237	237	262	262	212	212	109	109	288	298
AMRP8	AMRP	159	159	189	189	157	157	248	248	270	270	92	98	107	107	234	234	163	163	317	330	191	191	118	124	226	234	182	182	159	159	142	142	271	276	123	123	237	237	262	262	212	212	109	109	288	298
AMRP9	AMRP	159	159	189	189	157	157	248	248	270	270	92	92	107	107	234	234	163	163	317	330	191	191	118	124	226	234	182	182	150	150	142	142	276	276	123	123	237	237	256	262	212	212	109	109	288	298
AMRP10	AMRP	159	159	189	189	157	157	248	248	270	270	92	92	107	107	232	234	163	163	330	330	191	191	118	124	234	234	186	186	150	159	142	142	276	276	123	123	237	237	256	262	212	212	109	109	288	298
AMRP11	AMRP	159	160	189	189	157	157	248	248	270	270	92	98	107	107	232	234	163	163	317	330	191	195	124	124	234	234	182	182	150	159	142	142	271	276	123	123	237	237	262	262	212	212	109	109	288	298
AMRP12	AMRP	159	159	189	189	157	157	248	248	270	270	92	98	107	107	234	234	163	163	330	330	191	191	118	124	234	234	182	186	159	159	142	142	271	276	123	123	237	237	262	262	212	212	109	109	265	298
AMRP13	AMRP	159	159	189	189	157	157	248	248	270	270	92	92	107	107	232	234	163	163	317	330	191	195	118	124	234	234	186	186	150	150	142	142	276	276	123	123	237	237	256	262	212	212	109	109	288	298
AMRP14	AMRP	159	159	189	189	157	157	248	248	270	270	98	98	107	107	234	234	163	163	330	330	191	195	118	118	234	234	182	186	150	159	142	142	276	276	123	123	237	237	256	256	212	212	109	109	288	298
AMRP15	AMRP	159	159	189	189	157	157	248	248	270	270	98	98	107	107	236	236	163	163	330	330	191	195	118	124	234	234	182	186	150	159	142	142	276	276	123	123	237	237	256	256	212	212	109	109	288	298
AMRP16	AMRP	159	160	189	189	157	157	248	248	270	270	92	92	107	107	232	234	163	163	330	330	191	195	118	118	234	234	182	182	150	159	142	142	276	276	123	123	237	237	256	262	212	212	109	109	288	298
AMRP17	AMRP	159	159	189	189	157	157	248	248	270	270	92	98	107	107	234	234	163	163	330	330	191	195	118	124	234	234	182	186	150	159	142	142	276	276	123	123	237	237	256	262	212	212	109	109	288	298
AMRP18	AMRP	159	159	189	189	157	157	248	248	270	270	92	98	107	107	232	234	163	163	317	330	191	195	118	118	234	234	182	182	150	150	142	142	276	276	123	123	237	237	262	262	212	212	109	109	288	298
AMRP19	AMRP	159	159	189	189	157	157	248	248	270	270	92	92	107	107	234	234	163	163	317	330	191	191	118	124	226	234	182	182	150	159	142	142	276	276	123	123	237	237	256	262	212	212	109	109	288	298
AMRP20	AMRP	159	159	189	189	157	157	248	248	270	270	92	92	107	107	232	234	163	163	330	330	191	191	118	118	226	234	182	186	159	159	142	142	276	276	123	123	237	237	262	262	212	212	109	109	265	298
AMRP21	AMRP	159	159	189	189	157	157	248	248	270	270	92	92	107	107	234	234	163	163	330	330	191	191	118	118	226	226	182	182	150	150	142	142	276	276	123	123	237	237	262	262	212	212	109	109	265	298
AMRP22	AMRP	159	159	189	189	157	157	248	248	270	270	92	92	107	107	232	234	163	163	330	330	191	191	118	124	234	234	186	186	150	159	142	142	276	276	123	123	237	237	256	256	212	212	109	109	288	298
AMRP23	AMRP	159	159	189	189	157	157	248	248	270	270	92	92	107	107	234	234	163	163	317	330	191	195	118	124	234	234	182	186	150	150	142	142	276	276	123	123	237	237	256	256	212	212	109	109	288	298
AMRP24	AMRP	159	159	189	189	157	157	248	248	270	270	92	92	107	107	234	234	163	163	317	330	191	191	118	124	226	234	182	182	150	159	142	142	276	276	123	123	237	237	262	262	212	212	109	109	288	298
AMRP25	AMRP	159	160	189	189	157	157	248	248	270	270	92	98	107	107	234	234	163	163	317	330	191	191	118	124	234	234	182	186	159	159	142	142	276	276	123	123	237	237	262	262	212	212	109	109	288	298
AMRP26	AMRP	159	159	189	189	157	157	248	248	270	270	92	92	107	107	232	234	163	163	330	330	191	191	118	124	234	234	182	182	150	159	142	142	276	276	123	123	237	237	262	262	212	212	109	109	288	298
AMRP27	AMRP	159	159	189	189	157	157	248	248	270	270	92	98	107	107	232	234	163	163	317	330	191	191	124	124	226	234	182	186	150	159	142	142	276	276	123	123	237	237	256	262	212	212	109	109	288	298
AMRP28	AMRP	159	159	189	189	157	157	248	248	270	270	92	98	107	107	234	234	163	163	317	330	191	191	118	118	234	234	182	182	150	159	142	142	276	276	123	123	237	237	256	262	212	212	109	109	288	298
AMRP29	AMRP	159	159	189	189	157	157	248	248	270	270	92	92	107	107	232	234	163	163	317	330	191	191	118	124	226	234	182	186	150	159	142	142	276	276	123	123	237	237	256	262	212	212	109	109	288	298
AMRP30	AMRP	159	160	189	189	157	157	248	248	270	270	92	98	107	107	234	234	163	163	317	317	191	191	118	118	234	234	182	182	159	159	142	142	276	276	123	123	237	237	256	262	212	212	109	109	288	298
AMRP31	AMRP	159	159	189	189	157	157	248	248	270	270	92	92	107	107	232	234	163	163	330	330	191	191	118	118	226	226	182	186	159	159	142	142	276	276	123	123	237	237	256	262	212	212	109	109	288	298
AMRP32	AMRP	159	160	189	189	157	157	248	248	270	270	98	98	107	107	234	234	163	163	330	330	191	195	118	118	234	234	182	182	159	159	142	142	271	276	123	123	237	237	256	256	212	212	109	109	288	298
AMRP33	AMRP	159	160	189	189	157	157	248	248	270	270	92	98	107	107	234	234	163	163	317	317	191	191	118	118	226	226	182	182	150	150	142	142	276	276	123	123	237	237	256	262	212	212	109	109	265	298
AMRP34	AMRP	159	159	189	189	157	157	248	248	270	270	92	92	107	107	232	234	163	163	330	330	191	195	118	118	234	234	182	186	150	150	142	142	276	276	123	123	237	237	256	262	212	212	109	109	288	298
AMRP35	AMRP	159	159	189	189	157	157	248	248	270	270	92	92	107	107	234	234	163	163	317	330	191	195	118	118	234	234	182	182	150	159	142	142	276	276	123	123	237	237	262	262	212	212	109	109	288	298
AMRP36	AMRP	159	159	189	189	157	157	248	248	270	270	92	92	107	107	234	234	163	163	330	330	191	191	118	124	226	234	182	186	150	159	142	142	271	276	123	123	237	237	262	262	212	212	109	109	288	298
AMRP37	AMRP	159	159	189	189	157	157	248	248	270	270	92	98	107	107	234	234	163	163	330	330	195	195	118	124	234	234	182	182	159	159	142	142	271	276	142	142	237	237	262	262	212	212	109	109	288	298
AMRP38	AMRP	159	159	189	189	157	157	248	248	270	270	92	92	107	107	232	234	163	163	330	330	191	195	124	124	234	234	182	182	150	159	142	142	271	276	123	123	237	237	262	262	212	212	109	109	288	298
AMRP39	AMRP	159	160	189	189	157	157	248	248	270	270	92	98	107	107	234	234	163	163	317	317	191	191	118	124	226	234	182	186	150	150	142	142	276	276	123	123	237	237	256	262	212	212	109	109	288	298
AMRP40	AMRP	159	159	189	189	157	157	248	248	270	270	98	98	107	107	232	232	163	163	317	330	191	191	118	124	234	234	182	182	150	159	142	142	271	276	123	123	237	237	256	262	212	212	109	109	288	298
TKP1	rbTKP	159	159	189	189	155	155	248	248	239	239	98	98	107	107	232	232	163	163	301	313	191	202	124	124	234	234	182	182	151	151	156	156	275	276	143	143	237	237	262	262	212	212	109	109	266	275
TKP2	rbTKP	159	159	189	189	155	155	248	248	239	239	98	98	107	107	232	232	163	163	301	313	191	202	124	124	234	234	182	182	151	157	156	156	275	275	143	143	237	237	262	262	212	212	109	109	266	275
TKP3	rbTKP	159	163	187	189	155	155	248	248	239	239	98	98	107	107	232	232	163	163	301	313	191	202	124	124	234	234	169	182	151	157	156	156	273	276	143	143	237	237	262	262	212	212	109	109	266	275
TKP4	rbTKP	159	163	189	191	155	155	248	248	239	239	98	98	107	107	232	232	163	163	313	313	191	191	124	124	234	234	182	182	157	157	156	156	275	276	143	143	237	237	262	262	212	212	109	109	266	275
TKP5	rbTKP	159	163	189	191	155	155	248	248	239	239	98	98	107	107	232	232	163	163	301	313	191	202	124	124	234	234	182	182	151	157	156	156	275	276	143	143	237	237	262	262	212	212	109	109	266	275
TKP6	rbTKP	159	159	189	189	155	155	248	248	239	239	98	98	107	128	232	232	163	163	301	313	191	202	124	124	234	234	182	182	151	157	156	156	275	275	143	143	237	237	262	262	212	212	109	109	266	275
TKP7	rbTKP	159	163	189	189	155	155	248	248	239	239	98	98	107	107	232	232	163	163	301	313	191	202	124	124	234	234	182	182	151	151	156	156	275	276	143	143	237	237	262	262	212	212	109	109	266	275
TKP8	rbTKP	159	163	189	189	155	155	248	248	239	239	98	98	107	128	232	232	163	163	313	313	191	191	124	124	234	234	182	182	151	157	156	156	273	275	143	143	237	237	262	262	212	212	109	109	266	275
TKP9	rbTKP	159	159	189	189	155	155	248	248	239	239	98	98	107	107	232	232	163	163	313	313	191	191	124	124	234	234	182	182	151	151	156	156	275	275	143	143	237	237	262	262	212	212	109	109	266	275
TKP10	rbTKP	163	163	189	191	155	155	248	248	239	239	98	98	107	107	232	232	163	163	301	313	191	191	124	124	234	234	169	182	151	151	156	156	273	275	143	143	237	237	262	262	212	212	109	109	266	275
TKP11	rbTKP	159	163	189	189	155	155	248	248	239	239	98	98	107	107	232	232	163	163	313	313	191	191	124	124	234	234	182	182	151	151	156	156	275	276	143	143	237	237	262	262	212	212	109	109	266	275
TKP12	rbTKP	159	159	189	189	155	155	248	248	239	239	98	98	107	107	232	232	163	163	301	313	191	202	124	124	234	234	182	182	151	151	156	156	275	275	143	143	237	237	262	262	212	212	109	109	266	275
TKP13	rbTKP	163	163	189	191	155	155	248	248	239	239	98	98	107	107	232	232	163	163	313	313	191	191	124	124	234	234	182	182	151	157	156	156	275	276	143	143	237	237	262	262	212	212	109	109	266	275
TKP14	rbTKP	159	163	189	189	155	155	248	248	239	239	98	98	107	107	232	232	163	163	313	313	191	191	124	124	234	234	169	182	151	151	156	156	275	275	143	143	237	237	262	262	212	212	109	109	266	275
TKP15	rbTKP	163	163	189	189	155	155	248	248	239	239	98	98	107	107	232	232	163	163	313	313	191	191	124	124	234	234	182	182	151	157	156	156	275	275	143	143	237	237	262	262	212	212	109	109	266	275
TKP16	rbTKP	159	159	189	189	155	155	248	248	239	239	98	98	107	107	232	232	163	163	301	313	191	202	124	124	234	234	182	182	157	157	156	156	275	276	143	143	237	237	262	262	212	212	109	109	266	275
TKP17	rbTKP	159	163	191	191	155	155	248	248	239	239	98	98	107	128	232	232	163	163	301	313	191	202	124	124	234	234	182	182	151	151	156	156	275	275	143	143	237	237	262	262	212	212	109	109	266	275
TKP18	rbTKP	159	163	189	189	155	155	248	248	239	239	98	98	107	107	232	232	163	163	301	313	191	202	124	124	234	234	182	182	151	157	156	156	273	276	143	143	237	237	262	262	212	212	109	109	266	275
TKP19	rbTKP	163	163	189	191	155	155	248	248	239	239	98	98	107	107	232	232	163	163	301	313	191	191	124	124	234	234	169	182	151	157	156	156	275	276	143	143	237	237	262	262	212	212	109	109	266	275
TKP20	rbTKP	159	163	189	191	155	155	248	248	239	239	98	98	107	128	232	232	163	163	313	313	191	191	124	124	234	234	169	182	151	151	156	156	275	275	143	143	237	237	262	262	212	212	109	109	266	275
TKP21	rbTKP	163	163	189	189	155	155	248	248	239	239	98	98	107	107	232	232	163	163	313	313	191	191	124	124	234	234	182	182	151	151	156	156	275	276	143	143	237	237	262	262	212	212	109	109	266	275
TKP22	rbTKP	159	159	189	191	155	155	248	248	239	239	98	98	107	107	232	232	163	163	301	313	191	191	124	124	234	234	182	182	151	157	156	156	275	275	143	143	237	237	262	262	212	212	109	109	266	275
TKP23	rbTKP	159	163	189	189	155	155	248	248	239	239	98	98	107	107	232	232	163	163	301	313	191	202	124	124	234	234	182	182	151	151	156	156	275	275	143	143	237	237	262	262	212	212	109	109	266	275
TKP24	rbTKP	159	159	189	191	155	155	248	248	239	239	98	98	107	107	232	232	163	163	301	313	191	202	124	124	234	234	182	182	151	157	156	156	275	275	143	143	237	237	262	262	212	212	109	109	266	275
TKP25	rbTKP	163	163	189	189	155	155	248	248	239	239	98	98	107	107	232	232	163	163	301	313	191	202	124	124	234	234	182	182	151	151	156	156	275	275	143	143	237	237	262	262	212	212	109	109	266	275
TKP26	rbTKP	163	163	189	189	155	155	248	248	239	239	98	98	107	107	232	232	163	163	313	313	191	191	124	124	234	234	169	169	151	151	156	156	275	275	143	143	237	237	262	262	212	212	109	109	266	275
TKP27	rbTKP	159	159	189	191	155	155	248	248	239	239	98	98	107	107	232	232	163	163	301	313	191	202	124	124	234	234	182	182	151	151	156	156	275	276	143	143	237	237	262	262	212	212	109	109	266	275
TKP28	rbTKP	159	159	187	189	155	155	248	248	239	239	98	98	107	107	232	232	163	163	301	313	191	202	124	124	234	234	182	182	151	157	156	156	273	275	143	143	237	237	262	262	212	212	109	109	266	275
TKP29	rbTKP	163	163	189	189	155	155	248	248	239	239	98	98	107	107	232	232	163	163	301	313	191	191	124	124	234	234	182	182	151	151	156	156	275	275	143	143	237	237	262	262	212	212	109	109	0	0
TKP30	rbTKP	159	163	191	191	155	155	248	248	239	239	98	98	107	107	232	232	163	163	301	313	191	202	124	124	234	234	182	182	151	151	156	156	273	275	143	143	237	237	262	262	212	212	109	109	266	275
TKP31	rbTKP	159	163	189	189	155	155	248	248	239	239	98	98	107	107	232	232	163	163	301	313	191	202	124	124	234	234	182	182	151	157	156	156	275	276	143	143	237	237	262	262	212	212	109	109	266	275
TKP32	rbTKP	159	163	189	191	155	155	248	248	239	239	98	98	107	107	232	232	163	163	313	313	191	191	124	124	234	234	182	182	151	151	156	156	276	276	143	143	237	237	262	262	212	212	109	109	266	275
TKP33	rbTKP	159	163	189	189	155	155	248	248	239	239	98	98	107	107	232	232	163	163	313	313	191	202	124	124	234	234	182	182	151	157	156	156	275	275	143	143	237	237	262	262	212	212	109	109	266	275
TKP34	rbTKP	159	159	187	189	155	155	248	248	239	239	98	98	107	107	232	232	163	163	301	313	191	202	124	124	234	234	182	182	151	157	156	156	273	275	143	143	237	237	262	262	212	212	109	109	266	275
TKP35	rbTKP	159	163	189	189	155	155	248	248	239	239	98	98	107	107	232	232	163	163	313	313	191	202	124	124	234	234	182	182	157	157	156	156	273	275	143	143	237	237	262	262	212	212	109	109	266	275
TKP36	rbTKP	159	159	187	187	155	155	248	248	239	239	98	98	107	107	232	232	163	163	301	313	191	202	124	124	234	234	169	182	151	157	156	156	273	275	143	143	237	237	262	262	212	212	109	109	266	275
TKP37	rbTKP	159	159	187	189	155	155	248	248	239	239	98	98	107	107	232	232	163	163	313	313	191	191	124	124	234	234	169	182	151	151	156	156	275	275	143	143	237	237	262	262	212	212	109	109	266	275
TKP38	rbTKP	159	159	189	191	155	155	248	248	239	239	98	98	107	107	232	232	163	163	301	313	191	202	124	124	234	234	182	182	151	157	156	156	273	275	143	143	237	237	262	262	212	212	109	109	266	275
TKP39	rbTKP	163	163	189	189	155	155	248	248	239	239	98	98	107	107	232	232	163	163	313	313	191	191	124	124	234	234	182	182	151	157	156	156	275	276	143	143	237	237	262	262	212	212	109	109	266	275
TKP40	rbTKP	159	163	189	189	155	155	248	248	239	239	98	98	107	107	232	232	163	163	313	313	191	191	124	124	234	234	182	182	151	157	156	156	275	275	143	143	237	237	262	262	212	212	109	109	266	275
L_01	NIES-L	159	160	189	191	152	152	248	248	247	247	98	98	107	107	230	230	165	165	293	293	191	191	124	130	226	226	169	182	148	159	142	142	0	0	143	143	235	237	262	264	212	212	109	109	269	270
L_02	NIES-L	159	160	189	189	152	152	248	248	247	247	98	98	107	107	230	236	165	165	293	293	191	191	124	130	226	226	169	190	148	159	142	142	0	0	143	143	235	237	262	264	212	219	109	109	269	278
L_03	NIES-L	160	160	189	189	152	157	248	248	247	247	98	98	107	107	232	232	165	165	293	317	191	191	124	130	226	226	169	169	151	151	142	142	0	0	143	143	235	237	256	264	212	212	109	109	269	278
L_04	NIES-L	159	160	189	191	152	152	248	248	247	247	98	98	107	107	230	236	165	165	293	293	191	191	130	130	226	226	169	169	151	151	142	142	0	0	143	143	235	237	262	264	212	212	109	109	269	278
L_05	NIES-L	160	166	189	189	152	152	0	0	247	247	98	98	107	107	232	236	165	165	293	293	191	191	124	130	226	226	169	169	151	151	142	142	0	0	143	143	235	235	262	262	212	212	109	109	265	274
L_06	NIES-L	159	166	189	189	152	152	248	248	247	247	98	98	107	107	232	232	165	165	293	293	191	191	124	130	226	226	169	169	151	151	142	142	0	0	143	143	235	235	262	264	212	212	109	109	267	278
L_07	NIES-L	159	160	189	191	152	157	248	248	247	247	98	98	107	107	232	232	165	165	293	317	191	191	124	130	226	226	169	169	151	151	142	142	0	0	143	143	235	237	256	264	212	212	109	109	265	278
L_08	NIES-L	159	160	0	0	152	152	248	248	247	247	98	98	107	107	230	230	165	165	293	293	191	191	124	124	226	226	169	169	151	151	142	142	0	0	143	143	237	237	262	264	212	212	109	109	265	274
L_09	NIES-L	166	166	191	191	152	152	248	248	247	247	98	98	107	107	232	236	165	165	293	317	191	191	124	124	226	226	169	169	151	151	142	142	0	0	143	143	235	235	262	276	212	212	109	109	269	278
L_10	NIES-L	166	166	189	191	152	152	248	248	247	247	98	98	107	107	232	236	165	165	317	317	191	195	124	124	226	226	169	169	151	151	142	142	0	0	143	143	235	237	262	262	212	212	109	109	265	278
L_11	NIES-L	159	160	189	189	152	157	248	248	247	247	98	98	107	107	232	232	165	165	293	293	191	191	124	130	226	226	169	169	151	151	142	142	0	0	143	143	235	237	262	264	212	212	109	109	265	278
L_12	NIES-L	160	166	189	191	152	152	248	248	247	247	98	98	107	107	232	236	165	165	293	293	191	191	124	130	226	226	169	169	151	151	142	142	0	0	143	143	235	235	262	262	212	212	109	109	265	278
L_13	NIES-L	159	160	189	191	152	152	248	248	247	247	98	98	107	107	230	232	165	165	293	293	191	191	124	124	226	226	169	169	151	151	142	142	0	0	143	143	235	237	262	264	212	212	109	109	265	278
L_14	NIES-L	160	160	189	189	152	152	248	248	247	247	98	98	107	107	232	232	165	165	293	293	191	191	124	130	226	226	169	169	151	151	142	142	0	0	143	143	235	235	262	262	212	212	109	109	267	278
L_15	NIES-L	159	160	191	191	152	157	248	248	247	247	98	98	107	107	230	232	165	165	293	293	191	191	124	130	226	226	169	169	151	151	142	142	0	0	143	143	237	237	264	264	212	212	109	109	269	278
L_16	NIES-L	160	160	189	189	152	152	248	248	247	247	98	98	107	107	232	234	165	165	293	293	191	191	124	124	226	226	169	169	151	151	142	142	0	0	143	143	235	237	262	264	212	212	109	109	266	267
L_17	NIES-L	166	166	191	191	152	152	248	248	247	247	98	98	107	107	234	234	165	165	317	317	191	195	124	124	226	226	169	169	151	151	142	142	0	0	143	143	235	237	262	262	212	212	109	109	265	278
L_18	NIES-L	159	160	189	191	152	152	248	248	247	247	98	98	107	107	236	230	165	165	293	293	191	191	124	124	226	226	169	169	151	151	142	142	0	0	143	143	235	235	262	262	212	212	109	109	265	278
L_19	NIES-L	166	166	189	191	152	152	248	248	247	247	98	98	107	107	232	232	165	165	293	317	191	195	124	124	226	226	169	169	148	151	142	142	0	0	143	143	237	237	262	262	212	212	109	109	265	274
L_20	NIES-L	159	159	189	189	152	157	248	248	247	247	98	98	107	107	230	232	165	165	293	293	191	195	124	124	226	226	169	169	151	151	142	142	0	0	143	143	235	237	262	264	212	212	109	109	265	278
JD1	JD	161	161	189	191	157	157	248	254	249	270	96	96	107	128	232	232	163	163	293	303	191	191	124	124	226	226	169	182	147	155	152	152	273	273	142	142	237	237	262	262	212	212	109	109	260	275
JD2	JD	159	160	189	191	157	159	254	254	247	249	98	98	107	107	232	232	163	163	301	303	191	192	124	130	226	226	169	182	159	159	142	142	273	273	142	142	237	237	262	268	212	212	109	109	267	267
JD3	JD	159	161	189	189	137	159	250	254	249	255	94	98	107	107	232	232	163	163	293	293	191	202	124	130	226	226	169	182	155	159	142	152	273	275	142	142	237	237	262	262	212	212	109	109	260	275
JD4	JD	159	159	189	189	157	157	254	254	247	270	98	102	107	107	232	232	163	163	301	317	192	202	118	124	226	226	169	182	151	155	142	142	273	275	142	142	237	237	262	262	212	212	109	109	266	267
JD5	JD	159	159	189	191	157	157	254	254	255	255	96	102	107	107	232	232	163	163	301	301	192	192	130	130	226	234	169	169	159	159	142	142	273	273	142	142	237	237	262	262	212	212	109	109	265	275
JD6	JD	159	161	189	189	157	157	248	254	249	249	96	96	107	128	232	232	163	163	303	317	191	191	124	124	226	226	169	182	151	155	142	152	273	275	142	142	237	237	262	268	212	212	109	109	266	267
JD7	JD	160	160	189	189	157	157	254	254	247	249	92	98	107	107	232	232	163	163	301	317	191	192	124	124	226	234	169	169	151	159	142	142	273	273	142	142	237	237	262	262	212	212	109	109	266	267
JD8	JD	160	161	189	189	157	157	248	254	247	270	98	102	107	107	232	232	163	163	293	301	192	202	118	130	226	226	182	182	151	159	142	142	273	273	142	142	237	237	262	262	212	212	109	109	265	275
JD9	JD	160	161	189	189	157	159	254	254	249	249	94	98	131	131	232	232	163	163	293	303	191	191	124	130	226	226	169	169	147	159	142	142	275	275	142	142	237	237	262	262	212	212	109	109	267	267
JD10	JD	160	160	189	191	157	159	250	254	249	255	98	102	107	107	232	232	163	163	293	293	192	202	124	130	226	226	182	182	155	155	142	142	273	273	142	142	237	237	262	262	212	212	109	109	267	267
JD11	JD	159	161	189	189	157	157	250	254	247	249	96	102	107	107	232	232	163	163	301	301	192	192	130	130	226	226	182	182	155	155	142	142	275	275	123	142	237	237	262	262	212	212	109	109	265	267
JD12	JD	159	161	189	189	157	157	248	254	247	249	96	98	107	107	232	232	163	163	303	317	191	202	124	124	226	226	169	169	147	155	142	152	273	275	142	142	237	237	262	262	212	212	109	109	260	267
JD13	JD	159	161	189	191	157	157	254	254	247	255	96	96	107	128	232	232	163	163	303	317	191	202	124	124	226	226	169	169	147	155	152	152	273	275	142	142	237	237	262	262	212	212	109	109	265	267
JD14	JD	160	161	189	189	157	159	254	254	255	270	94	94	107	107	232	232	163	163	293	301	192	192	130	130	234	234	169	182	151	155	142	142	273	273	142	142	237	237	262	262	212	212	109	109	266	267
JD15	JD	159	159	191	191	157	159	254	254	255	255	98	98	107	107	232	232	163	163	301	303	191	192	130	130	226	226	169	182	155	159	142	142	273	273	142	142	237	237	262	262	212	212	109	109	266	267
JD16	JD	159	160	189	189	159	159	254	254	247	255	98	98	107	107	232	232	163	163	293	303	191	202	124	130	226	226	169	169	151	155	142	142	273	275	142	142	237	237	262	262	212	212	109	109	267	267
JW1	JW	160	160	189	189	137	157	254	254	249	255	96	98	107	107	232	232	163	163	293	293	191	191	124	124	226	226	169	169	159	159	142	152	273	275	143	143	237	237	262	264	212	212	109	109	265	274
JW2	JW	159	160	189	189	157	157	248	254	249	255	98	102	131	131	232	234	163	163	293	303	191	191	124	130	226	226	169	182	151	155	142	152	275	275	142	142	237	237	262	262	212	212	109	109	260	274
JW3	JW	159	160	189	189	157	159	248	254	249	249	98	102	107	107	232	232	163	163	293	311	191	191	124	130	226	226	169	173	151	155	142	142	273	275	142	142	237	237	262	262	212	212	109	109	260	267
JW4	JW	160	161	191	191	157	157	248	254	249	255	96	98	107	131	232	234	163	163	303	311	191	195	124	130	226	226	169	169	155	159	142	152	273	273	123	123	230	237	262	262	212	212	109	109	265	267
JW5	JW	160	160	191	191	157	157	248	250	247	255	96	96	131	131	232	234	163	163	303	311	191	195	130	130	226	226	173	173	155	155	142	152	273	275	142	142	230	237	262	268	212	212	109	109	265	267
JW6	JW	160	160	189	191	157	157	250	254	247	249	96	98	131	131	232	234	163	163	293	303	191	191	124	130	226	226	173	173	155	155	142	152	273	273	123	123	237	237	262	262	212	212	109	109	265	267
JW7	JW	159	160	189	189	157	159	250	254	249	255	98	98	131	131	232	234	163	163	293	293	191	191	124	124	226	226	169	169	151	159	142	142	273	275	143	143	230	237	262	264	212	212	109	109	260	267
JW8	JW	159	160	189	191	137	159	248	250	249	249	96	98	131	131	232	232	163	163	293	303	191	191	130	130	226	226	169	169	151	159	152	152	273	273	143	143	237	237	262	262	212	212	109	109	260	274
JW9	JW	160	160	189	189	137	159	250	254	247	249	96	98	107	107	232	232	163	163	303	311	191	195	124	124	226	226	169	169	155	159	142	152	273	273	143	143	237	237	262	262	212	212	109	109	260	274
JW10	JW	160	160	189	191	157	159	248	254	249	249	96	102	131	131	232	232	163	163	293	311	191	191	124	130	226	226	169	169	159	159	142	142	273	275	143	143	230	237	262	262	212	212	109	109	260	267
JW11	JW	160	160	189	189	157	159	250	250	239	247	98	98	131	131	232	234	163	163	303	303	191	191	124	130	226	226	169	169	159	159	142	152	273	273	142	142	237	237	262	262	212	212	109	109	265	274
JW12	JW	160	160	189	191	157	157	248	254	249	249	92	98	107	107	232	232	163	163	293	311	191	191	124	124	226	226	169	169	159	159	142	152	273	275	142	142	230	237	262	262	212	212	109	109	260	267
E1	Estonia	159	159	187	189	159	159	248	248	270	270	102	102	107	107	232	234	163	163	330	330	189	189	132	132	226	226	169	169	147	147	142	142	276	276	143	143	235	235	262	270	210	212	109	109	259	268
E2	Estonia	159	159	187	189	157	159	248	248	247	247	98	98	107	107	234	234	163	163	317	330	189	191	132	132	226	226	169	169	147	151	142	142	276	276	143	143	235	235	262	270	210	212	109	109	259	268
E3	Estonia	159	159	187	187	159	159	248	248	247	270	98	98	107	107	232	234	163	163	317	317	191	191	132	132	226	226	169	169	147	151	142	142	276	276	143	143	235	235	262	270	212	212	109	109	259	268
E4	Estonia	159	159	187	189	157	159	248	248	247	270	98	98	107	107	232	232	163	163	317	317	191	191	132	132	226	226	169	169	147	147	142	142	271	276	143	143	235	235	262	270	212	212	109	109	259	268
E5	Estonia	159	159	187	187	159	159	248	248	247	247	98	98	107	107	232	234	163	163	317	317	191	191	132	132	226	226	169	169	147	151	142	142	271	276	143	143	235	235	262	270	210	210	109	109	259	268
E6	Estonia	159	159	187	189	157	159	248	248	270	270	102	102	107	107	232	232	163	163	317	317	191	191	132	132	226	226	169	169	147	147	142	142	276	276	143	143	235	235	262	262	210	212	109	109	259	268
Br_01	NIES-Br	159	163	187	189	157	157	248	254	247	247	94	98	107	128	230	232	163	163	301	330	191	191	124	124	226	226	182	182	0	0	142	152	0	0	142	142	237	239	262	262	210	210	109	109	259	268
Br_02	NIES-Br	159	161	189	189	157	157	248	254	247	247	94	94	128	128	230	232	163	165	301	301	202	202	124	124	226	226	182	186	0	0	142	142	0	0	0	0	0	0	262	270	210	210	109	109	266	267
Br_03	NIES-Br	159	159	189	189	157	157	248	254	247	247	94	98	107	107	230	232	163	165	301	317	195	202	124	130	226	226	169	169	151	153	142	156	0	0	0	0	237	238	256	256	210	212	109	109	267	267
Br_04	NIES-Br	159	161	189	189	157	157	248	250	239	247	98	98	107	107	230	234	165	165	301	317	191	202	124	137	226	226	182	182	153	161	152	156	0	0	142	142	236	237	256	262	212	212	109	109	259	277
Br_05	NIES-Br	163	164	189	189	157	157	248	254	247	247	94	98	128	128	232	232	163	163	317	330	191	202	124	130	226	226	169	169	151	161	142	142	0	0	123	123	237	239	256	272	210	212	109	109	259	274
Br_06	NIES-Br	159	159	187	189	157	157	248	254	239	247	94	98	107	107	230	232	163	165	301	317	191	191	124	130	226	226	169	182	147	151	142	156	0	0	123	142	237	237	256	256	210	210	109	109	267	277
Br_07	NIES-Br	159	164	187	187	157	157	248	254	239	247	98	98	107	131	230	232	165	165	301	317	195	202	124	124	226	226	182	190	155	159	156	156	0	0	142	142	237	237	262	262	212	212	109	109	267	267
Br_08	NIES-Br	159	161	0	0	157	157	248	254	247	247	94	98	128	128	230	232	163	165	301	301	202	202	124	124	226	226	169	182	159	159	142	156	0	0	123	123	237	237	262	270	212	212	109	109	259	267
Br_09	NIES-Br	159	163	189	189	157	157	254	254	239	247	94	98	107	107	230	234	163	165	301	317	191	195	124	124	226	226	169	169	151	161	152	152	0	0	142	142	237	238	262	262	210	210	109	109	259	268
Br_10	NIES-Br	164	164	189	189	157	157	248	248	247	247	94	98	107	107	230	230	163	165	301	330	191	191	124	124	226	226	169	182	151	155	142	152	0	0	123	123	237	238	262	262	210	210	109	109	259	267
Br_11	NIES-Br	159	161	189	189	157	157	248	248	239	247	94	98	107	131	230	234	163	163	317	317	195	202	124	124	226	226	169	190	153	159	142	142	0	0	142	142	237	239	256	256	212	212	109	109	267	267
Br_12	NIES-Br	163	163	189	189	157	157	248	254	239	247	94	94	131	131	232	237	163	165	301	317	202	202	124	130	226	226	169	190	151	151	142	156	0	0	123	123	237	238	256	256	210	212	109	109	259	275
Br_13	NIES-Br	159	161	189	189	157	157	248	254	247	247	98	98	107	107	230	234	163	165	301	317	195	202	124	124	226	226	169	182	147	151	142	142	0	0	142	142	237	238	256	262	212	212	109	109	266	278
Br_14	NIES-Br	164	164	189	189	157	157	248	248	247	247	94	98	107	107	230	237	163	165	301	330	191	202	124	124	226	226	169	190	155	159	142	142	0	0	123	142	237	238	262	262	212	212	109	109	267	267
Br_15	NIES-Br	163	164	189	189	157	157	254	254	239	247	98	98	131	131	232	237	163	165	301	317	195	202	124	124	226	226	182	190	151	161	152	156	0	0	123	142	237	237	256	262	212	212	109	109	259	268
Br_16	NIES-Br	163	164	189	189	157	157	248	254	239	247	98	98	128	128	232	232	163	165	317	330	202	202	124	130	226	226	169	169	151	151	142	156	0	0	142	142	237	237	256	256	210	210	109	109	265	275
Br_17	NIES-Br	159	163	187	189	157	157	248	254	239	247	94	94	107	128	230	232	163	165	301	301	202	202	130	130	226	226	190	190	147	151	142	156	0	0	142	142	236	237	262	272	210	210	109	109	259	267
Br_18	NIES-Br	159	163	187	189	157	157	254	254	239	247	94	98	107	107	232	232	163	165	301	330	191	202	124	124	226	226	169	190	155	159	142	142	0	0	142	142	237	237	262	262	210	212	109	109	259	268
Br_19	NIES-Br	163	163	189	189	157	157	248	254	247	247	92	92	128	128	232	232	163	163	301	301	202	202	124	130	226	226	169	182	155	161	142	156	0	0	142	142	237	238	256	256	212	212	109	109	259	268
Br_20	NIES-Br	159	159	189	189	157	157	248	250	239	247	98	98	107	107	232	234	163	165	301	317	195	202	124	130	226	226	169	190	147	151	142	142	0	0	142	142	237	237	256	262	313	212	109	109	267	267
Br_21	NIES-Br	161	163	189	189	157	157	248	248	247	247	98	98	128	128	230	234	163	163	301	317	191	195	124	124	226	226	182	190	153	159	142	152	0	0	142	142	237	238	262	262	210	210	109	109	259	268
Fr_01	NIES-Fr	161	161	187	187	159	159	248	248	249	270	96	96	107	107	234	234	163	163	317	317	195	195	124	130	226	234	169	169	151	161	142	142	0	0	142	142	237	237	262	262	212	212	109	109	265	267
Fr_02	NIES-Fr	160	161	187	191	135	159	248	248	249	249	96	96	107	107	234	234	165	165	330	330	195	195	124	124	234	234	169	190	147	159	142	142	0	0	142	142	237	237	262	262	212	212	109	109	267	267
Fr_03	NIES-Fr	160	160	187	191	135	159	248	248	249	270	96	96	107	107	234	234	163	163	317	330	189	195	124	124	234	234	169	169	161	161	142	142	0	0	142	142	237	237	262	262	212	212	109	109	265	267
Fr_04	NIES-Fr	160	161	187	187	135	159	248	248	249	270	96	96	107	107	234	234	163	165	317	317	195	195	124	124	226	234	169	169	151	161	142	142	0	0	142	142	237	237	262	262	212	212	109	109	265	267
Fr_05	NIES-Fr	160	161	191	191	135	159	248	248	249	249	96	96	107	107	234	234	163	165	330	330	195	195	124	124	234	234	169	169	161	161	142	142	0	0	142	142	237	237	262	262	212	212	109	109	267	267
Fr_06	NIES-Fr	160	161	187	187	135	159	248	248	270	270	96	96	107	107	234	234	163	163	317	317	195	195	124	124	226	234	169	169	147	161	142	142	0	0	142	142	237	237	262	262	212	212	109	109	267	267
Fr_07	NIES-Fr	160	161	191	191	159	159	248	248	249	270	96	96	107	107	234	234	163	165	317	330	195	195	124	124	234	234	169	169	147	147	142	142	0	0	142	142	237	237	262	262	212	212	109	109	267	267
Fr_08	NIES-Fr	160	160	187	187	135	159	248	248	249	249	96	96	107	107	234	234	163	165	317	330	189	195	124	124	226	234	169	169	161	161	142	142	0	0	142	142	237	237	262	262	212	212	109	109	265	267
Fr_09	NIES-Fr	160	161	187	191	135	159	248	248	249	270	96	96	107	107	234	234	163	165	317	330	195	195	124	124	226	234	169	169	147	147	142	142	0	0	142	142	237	237	262	262	212	212	109	109	265	274
Fr_10	NIES-Fr	160	161	187	187	135	159	248	248	270	270	96	96	107	107	234	234	163	163	317	317	195	195	124	124	234	234	169	169	151	161	142	142	0	0	142	142	237	237	262	262	212	212	109	109	267	267
Fr_11	NIES-Fr	161	161	187	191	159	159	248	248	270	270	96	96	107	107	234	234	163	163	317	317	189	195	124	124	226	234	169	169	161	161	142	142	0	0	142	142	237	237	262	262	212	212	109	109	265	267
Fr_12	NIES-Fr	160	161	187	191	135	159	248	248	249	249	96	96	107	107	234	234	163	163	317	330	189	195	124	124	226	234	169	169	147	151	142	142	0	0	142	142	237	237	262	262	212	212	109	109	265	267
Fr_13	NIES-Fr	160	160	187	187	135	159	248	248	270	270	96	96	107	107	234	234	163	163	317	317	195	195	124	124	226	234	169	169	161	161	142	142	0	0	142	142	237	237	262	262	212	212	109	109	267	267
Fr_14	NIES-Fr	161	161	0	0	135	159	248	248	249	270	96	96	107	107	234	234	163	165	317	317	195	195	124	124	234	234	169	169	151	161	142	142	0	0	142	142	237	237	262	262	212	212	109	109	267	267
Fr_15	NIES-Fr	160	161	187	187	159	159	248	248	270	270	96	96	107	107	234	234	163	163	317	330	189	195	124	124	226	234	169	169	161	161	142	142	0	0	142	142	237	237	262	262	212	212	109	109	265	274
Fr_16	NIES-Fr	160	160	187	187	135	159	248	248	249	270	96	96	107	107	234	234	163	163	317	317	189	195	124	124	234	234	169	169	147	151	142	142	0	0	142	142	237	237	262	262	212	212	109	109	265	267
Fr_17	NIES-Fr	160	161	187	187	159	159	248	248	270	270	96	96	107	107	234	234	163	163	317	330	189	195	124	124	226	234	169	169	151	161	142	142	0	0	123	142	237	237	262	262	212	212	109	109	265	267
Fr_18	NIES-Fr	160	161	187	187	135	159	248	248	270	270	96	96	107	107	234	234	165	165	317	330	195	195	124	124	234	234	169	169	147	161	142	142	0	0	142	142	237	237	262	262	212	212	109	109	267	267
Fr_19	NIES-Fr	160	161	187	191	135	159	248	248	270	270	96	96	107	107	234	234	163	163	317	317	195	195	124	124	226	234	169	169	147	151	142	142	0	0	142	142	237	237	262	262	212	212	109	109	265	274
Hr_01	NIES-Hn	159	164	189	189	159	159	248	254	249	249	98	98	107	107	232	234	163	163	317	317	191	191	130	130	227	234	169	190	147	147	142	142	271	276	143	143	237	237	262	262	210	212	109	109	0	0
Hr_02	NIES-Hn	159	164	189	189	157	159	254	254	247	247	92	94	107	107	234	236	163	163	317	330	191	191	130	131	226	226	169	182	147	147	142	142	271	275	143	143	237	237	262	262	210	212	109	109	260	267
Hr_03	NIES-Hn	159	164	187	189	137	157	254	254	247	249	94	94	107	140	236	236	163	163	317	317	191	191	124	130	226	226	169	169	147	159	142	142	274	276	143	143	237	237	262	262	212	212	109	109	259	267
Hr_04	NIES-Hn	163	164	187	189	157	159	254	254	255	255	94	98	107	107	234	234	163	163	330	330	191	191	130	131	226	226	169	182	147	147	142	142	274	276	143	143	237	237	262	262	212	212	109	109	260	260
Hr_05	NIES-Hn	163	164	187	189	157	159	248	248	249	249	94	94	107	107	234	236	163	163	317	330	191	191	124	130	227	234	182	190	159	159	142	142	274	276	143	143	237	237	262	262	210	212	109	109	260	267
Hr_06	NIES-Hn	163	164	187	189	157	159	248	254	239	249	94	98	107	107	234	236	163	163	330	330	191	191	124	130	227	227	182	182	159	159	142	142	274	274	143	143	237	239	262	262	212	212	109	109	267	267
Hr_07	NIES-Hn	159	163	187	189	157	159	254	254	255	255	92	98	107	140	234	236	163	163	330	330	191	191	124	130	227	227	169	182	147	147	142	142	271	276	143	143	237	237	256	262	210	212	109	109	260	260
Hr_08	NIES-Hn	159	159	189	189	159	159	254	254	247	247	94	98	107	140	234	234	163	163	317	330	191	191	130	131	227	227	169	182	147	147	142	142	275	275	143	143	237	237	256	262	212	212	109	109	260	260
Hr_09	NIES-Hn	163	164	189	189	157	159	254	254	247	247	94	94	107	107	232	234	163	163	317	330	191	191	124	130	226	226	182	190	147	161	142	142	274	276	143	143	237	239	262	262	210	212	109	109	259	267
Hr_10	NIES-Hn	159	161	187	189	159	159	248	254	239	249	92	98	107	107	234	236	163	163	317	330	191	191	124	130	226	226	182	190	147	147	142	142	274	276	143	143	237	239	262	262	210	212	109	109	260	267
Hr_11	NIES-Hn	159	161	187	189	157	157	248	248	249	249	94	98	107	107	234	236	163	163	317	317	191	191	124	131	227	227	169	190	147	159	142	142	271	274	143	143	237	239	262	262	212	212	109	109	260	260
Hr_12	NIES-Hn	164	164	187	189	137	157	254	254	239	249	94	98	131	131	232	234	163	163	317	330	191	191	130	131	227	227	169	190	147	151	142	142	271	274	143	143	237	237	262	262	210	212	109	109	259	267
Hr_13	NIES-Hn	161	164	187	189	157	157	248	248	239	249	94	98	0	0	232	234	163	163	317	317	191	191	124	131	226	226	169	169	147	159	142	142	271	276	143	143	237	237	262	262	212	212	109	109	260	260
Hr_14	NIES-Hn	159	160	186	187	157	159	254	254	249	249	98	98	107	128	234	234	163	163	317	330	191	191	124	130	227	227	169	190	147	159	142	142	274	276	143	143	237	237	262	262	210	212	109	109	267	267
Hr_15	NIES-Hn	163	164	189	189	157	159	248	254	249	249	94	98	131	131	234	234	163	163	317	317	191	191	124	130	226	226	169	169	148	147	142	142	0	0	143	143	237	239	262	262	210	210	109	109	260	267
Hr_16	NIES-Hn	161	163	187	189	159	159	248	248	249	249	94	98	107	107	236	236	163	163	317	330	191	191	124	124	226	226	169	190	151	159	142	142	271	276	143	143	237	237	262	262	210	212	109	109	0	0
Hr_17	NIES-Hn	159	164	189	191	157	159	248	254	247	247	94	98	131	131	234	234	163	163	330	330	191	191	124	130	227	227	169	182	147	147	0	0	271	274	143	143	237	237	262	262	210	212	109	109	267	267
Hr_18	NIES-Hn	159	164	187	189	157	157	248	254	239	239	94	98	131	131	234	234	163	163	317	330	191	191	124	130	226	234	169	169	147	159	142	142	274	276	143	143	237	237	262	262	210	212	109	109	260	267
Hr_19	NIES-Hn	159	164	187	187	137	157	248	254	255	255	94	98	107	107	234	236	163	163	317	330	191	191	124	130	226	226	169	182	159	159	142	142	274	276	143	143	237	237	262	262	210	212	109	109	260	260
Hr_20	NIES-Hn	159	164	187	189	157	157	248	248	239	249	94	98	128	128	232	234	163	163	317	317	191	191	124	124	226	226	169	190	159	159	142	142	276	276	143	143	237	239	262	262	210	212	109	109	260	260
W1	W	159	159	189	189	152	152	248	254	239	270	94	94	107	128	232	234	163	163	301	313	195	202	124	124	226	234	169	169	151	151	156	156	270	275	143	143	237	237	256	268	212	212	109	109	267	267
W2	W	160	161	187	187	137	157	250	250	239	239	98	98	107	107	232	232	163	165	301	313	202	202	124	130	226	232	173	175	151	151	142	156	270	270	143	143	230	237	256	268	212	212	109	109	261	267
W3	W	159	159	187	189	137	152	250	254	239	270	92	92	107	128	232	232	163	163	293	293	195	202	124	130	226	234	169	169	151	151	142	142	270	273	143	143	237	237	256	256	212	212	109	109	266	275
W4	W	159	163	189	189	152	157	248	254	239	270	98	98	107	107	232	236	163	163	293	301	191	202	124	124	232	234	169	169	151	161	142	156	271	273	143	143	230	239	256	268	212	212	109	109	266	267
W5	W	159	163	187	189	152	157	250	254	239	249	94	94	107	107	234	236	163	163	293	317	195	195	130	136	226	232	169	169	151	151	156	156	271	271	142	142	230	237	252	256	212	212	109	109	266	278
W6	W	159	160	187	189	137	137	248	248	239	239	94	98	126	128	230	234	163	163	293	317	202	202	124	124	234	234	169	182	151	155	142	156	273	273	143	143	237	237	252	262	212	212	109	109	266	275
W7	W	159	159	187	187	137	152	248	250	239	270	92	92	107	107	232	234	163	163	330	330	195	202	124	124	226	234	169	173	150	151	142	156	270	273	143	143	237	237	252	256	212	212	109	109	261	275
W8	W	160	161	189	191	152	152	248	248	270	270	92	92	107	128	232	232	163	165	293	293	191	202	124	124	226	251	173	182	147	147	156	156	273	275	143	143	230	237	256	262	210	212	109	109	266	275
W9	W	159	159	189	189	157	159	248	250	239	239	94	98	107	107	234	234	165	165	293	301	191	202	118	130	226	234	169	169	150	164	142	142	270	273	143	143	239	239	256	256	210	212	109	109	266	267
W10	W	163	163	187	187	137	157	254	254	239	270	92	92	107	107	234	236	163	163	293	293	195	202	124	136	228	232	169	169	147	161	142	152	271	273	143	143	230	237	256	268	212	212	109	109	261	275
W11	W	159	163	189	189	137	159	248	248	247	270	98	98	107	107	232	234	163	163	293	330	195	202	130	130	232	232	169	169	150	151	142	142	273	273	123	123	237	237	256	256	212	212	109	109	266	267
W12	W	159	163	187	189	137	159	248	250	239	265	92	98	128	128	230	236	163	163	293	293	202	202	124	124	226	232	169	169	151	151	152	156	271	273	143	143	230	237	256	262	212	212	109	109	266	278
W13	W	159	159	189	189	159	159	248	254	239	270	92	92	128	128	232	236	163	163	293	293	195	195	124	130	232	234	169	182	151	151	156	156	273	273	143	143	237	239	252	262	212	212	109	109	266	275
W14	W	159	163	187	189	137	152	254	254	239	247	98	98	107	107	234	236	161	165	301	317	202	202	124	130	232	232	169	169	150	151	142	156	271	273	143	143	230	239	256	268	212	212	109	109	266	267
W15	W	159	159	187	189	152	157	248	248	239	270	98	98	107	128	234	236	163	163	293	313	191	202	124	130	226	232	169	175	151	155	142	142	270	270	123	123	237	237	256	262	212	212	109	109	266	267
W16	W	160	163	187	189	137	152	248	254	239	247	94	98	107	126	232	232	165	165	293	293	202	202	124	124	226	232	169	190	147	155	142	156	273	273	143	143	230	237	262	262	212	212	109	109	261	267
W17	W	159	163	187	189	137	157	248	250	247	270	98	98	107	107	232	236	163	165	293	293	195	195	124	130	226	234	169	169	151	151	156	156	273	275	143	143	237	237	256	256	212	212	109	109	266	278
W18	W	159	163	187	189	152	152	248	250	239	270	92	92	107	107	232	234	163	165	293	293	195	202	124	124	226	232	169	169	147	151	156	156	273	275	143	143	237	239	262	262	212	212	109	109	261	275
W19	W	159	159	189	189	157	159	248	248	239	270	98	98	128	128	232	236	163	163	293	293	195	202	124	124	226	232	169	173	151	164	156	156	275	275	143	143	235	237	262	268	212	212	109	109	261	267
W20	W	159	161	189	189	152	157	254	254	239	270	98	98	126	128	234	236	163	163	303	313	191	195	124	130	226	234	169	169	150	151	142	156	271	273	143	143	237	237	262	268	212	212	109	109	267	278
W21	W	161	163	187	187	137	157	248	248	239	270	98	98	107	107	232	234	163	163	293	313	191	191	124	130	226	234	169	169	151	151	142	156	273	275	143	143	237	237	256	262	212	212	109	109	266	275
W22	W	159	163	189	189	152	157	248	248	239	270	98	98	107	128	232	234	163	165	313	330	195	202	124	130	226	234	169	175	151	151	152	156	270	273	143	143	230	237	256	256	212	212	109	109	261	275
W23	W	160	160	187	189	157	157	248	254	239	270	92	92	107	126	232	232	165	165	301	303	202	202	124	124	226	232	175	182	151	155	142	142	273	273	143	143	237	239	256	256	210	212	109	109	261	278
W24	W	159	159	189	189	152	152	248	248	239	270	92	92	107	128	232	236	163	163	293	330	192	195	124	130	226	226	169	169	151	155	142	156	270	271	123	142	237	237	262	268	212	212	109	109	266	275
W25	W	159	160	187	189	152	159	248	254	239	239	92	92	107	128	234	236	163	163	293	330	191	191	124	136	226	234	169	169	150	151	142	142	270	273	0	0	237	239	262	268	210	212	109	109	266	275
W26	W	159	159	187	189	137	152	254	254	239	249	92	94	107	126	232	234	163	163	293	330	191	202	130	130	234	251	169	173	147	155	156	156	273	273	143	143	230	237	256	262	212	212	109	109	266	267
W27	W	159	159	189	189	137	152	248	248	239	270	94	94	107	107	232	234	163	163	293	293	191	195	124	124	226	234	169	173	151	151	142	142	273	275	143	143	235	237	256	268	212	212	109	109	266	267
W28	W	159	163	187	189	152	157	248	254	239	270	94	94	107	107	232	236	163	163	293	330	191	202	124	124	226	234	169	169	147	164	142	142	271	273	143	143	230	237	262	262	212	212	109	109	266	275
W29	W	159	159	187	189	137	152	254	254	239	239	92	94	128	128	232	236	163	163	293	301	195	195	124	130	226	232	169	169	151	155	142	152	270	273	143	143	237	239	256	268	210	212	109	109	266	267
W30	W	159	161	187	187	152	159	254	254	249	270	94	94	107	128	232	232	165	165	293	303	191	202	124	130	234	234	173	190	151	151	142	156	271	275	123	123	237	239	262	262	212	212	109	109	267	267
W31	W	159	160	187	189	137	152	254	254	239	270	94	98	107	107	230	232	163	165	301	330	192	195	124	124	228	228	169	169	151	153	152	156	273	275	143	143	237	237	252	262	210	212	109	109	261	275
W32	W	159	159	191	191	137	152	248	248	239	270	94	94	126	128	232	234	163	163	293	330	191	195	124	124	228	234	169	182	147	155	142	156	273	273	143	143	235	237	252	262	212	212	109	109	261	270
W33	W	159	160	189	189	137	152	248	254	239	270	98	98	107	107	234	236	165	165	293	313	191	202	124	130	226	232	169	182	153	155	142	156	270	270	143	143	237	237	256	268	212	212	109	109	266	275
W34	W	159	163	187	189	157	159	250	254	239	265	92	94	107	128	234	236	163	163	293	293	202	202	124	136	232	234	169	169	150	151	156	156	273	273	143	143	237	239	256	256	212	212	109	109	266	267
W35	W	159	160	187	189	152	152	248	254	270	270	94	94	107	128	232	236	163	165	293	301	192	195	124	130	226	226	169	169	151	155	142	142	273	273	143	143	230	239	256	262	212	212	109	109	266	275
W36	W	159	163	187	189	137	152	248	248	239	270	98	98	128	128	230	234	163	165	303	313	191	202	124	130	232	232	169	169	151	151	142	142	273	275	123	143	237	237	252	256	212	212	109	109	266	278
W37	W	160	161	189	189	137	157	248	248	239	249	92	92	107	128	234	236	163	163	293	330	191	191	124	130	226	234	169	169	151	151	142	156	273	273	143	143	237	237	256	256	210	212	109	109	266	267
W38	W	159	163	189	191	137	152	250	254	239	239	92	92	107	128	232	232	163	163	293	301	195	202	124	136	226	232	169	169	147	151	142	142	271	275	143	143	237	237	262	268	210	212	109	109	266	278
W39	W	159	160	187	189	137	159	248	254	239	265	98	98	107	128	232	234	163	165	293	293	195	202	124	130	232	234	169	169	151	161	142	156	273	273	143	143	237	239	252	268	212	212	109	109	267	278
W40	W	159	163	187	191	152	157	248	254	247	265	94	94	107	107	230	236	163	165	293	293	191	202	124	124	226	226	169	173	147	151	142	142	271	273	123	143	237	237	262	272	212	212	109	109	266	275
YIO63894	Tsushima	164	164	189	192	157	160	250	252	239	239	96	98	107	107	234	235	163	163	301	301	195	195	122	130	224	224	179	182	150	151	142	142	283	283	142	144	237	240	272	272	212	212	109	109	267	269
YIO64458	Tsushima	164	170	187	189	157	157	248	252	239	254	98	102	107	107	232	235	163	163	293	301	195	195	120	124	226	226	176	196	150	151	143	150	283	283	142	144	237	237	256	262	209	212	109	109	260	282
WildT01	Honshu	163	163	0	0	172	172	248	248	0	0	96	98	107	107	235	235	0	0	0	0	189	191	0	0	232	232	0	0	0	0	156	156	0	0	143	145	0	0	0	0	0	0	0	0	0	0
WildT02	Honshu	0	0	189	189	135	157	0	0	249	249	96	98	107	107	232	235	0	0	0	0	189	191	0	0	224	224	0	0	0	0	156	156	0	0	142	144	0	0	0	0	0	0	109	109	0	0
WildT03	Honshu	0	0	0	0	155	159	0	0	0	0	92	92	0	0	235	235	0	0	0	0	0	0	0	0	0	0	169	182	0	0	142	152	276	276	142	144	0	0	0	0	0	0	109	109	0	0
WildT04	Honshu	0	0	0	0	135	135	0	0	247	249	96	98	107	107	235	237	163	163	0	0	191	195	120	120	226	226	0	0	0	0	0	0	281	281	142	144	0	0	0	0	0	0	0	0	0	0
A0279	Honshu	159	161	189	189	155	157	248	248	239	249	92	98	107	126	235	235	163	163	0	0	191	191	122	122	224	238	180	186	159	169	148	148	276	276	142	144	237	237	276	276	0	0	109	109	0	0
A1791	Honshu	0	0	187	189	159	159	0	0	0	0	92	96	107	126	235	237	0	0	0	0	191	195	0	0	0	0	0	0	0	0	0	0	0	0	0	0	0	0	0	0	0	0	0	0	0	0
A1796	Honshu	160	164	0	0	135	162	0	0	0	0	0	0	0	0	235	237	0	0	0	0	191	195	0	0	0	0	0	0	0	0	142	156	0	0	0	0	237	237	0	0	0	0	109	109	260	267
A1798	Honshu	160	164	0	0	0	0	0	0	0	0	0	0	0	0	235	237	0	0	0	0	191	191	0	0	226	226	0	0	0	0	142	142	0	0	0	0	0	0	0	0	0	0	0	0	0	0
A1800	Honshu	161	161	0	0	135	157	0	0	0	0	0	0	0	0	235	235	163	163	0	0	0	0	0	0	0	0	182	182	0	0	0	0	0	0	143	145	235	235	0	0	0	0	0	0	0	0
VA744	Honshu	160	164	187	189	0	0	247	248	0	0	98	98	0	0	231	231	0	0	317	317	191	204	124	124	0	0	169	169	147	147	0	0	271	276	143	143	0	0	276	279	212	212	0	0	0	0
VA745	Honshu	161	161	187	187	149	149	247	247	0	0	96	98	0	0	231	231	0	0	0	0	0	0	0	0	0	0	165	165	147	147	0	0	271	276	143	143	0	0	276	283	219	219	0	0	0	0
VA945	Honshu	161	164	185	187	147	149	0	0	0	0	0	0	0	0	231	231	0	0	0	0	191	191	0	0	0	0	0	0	147	147	0	0	271	276	143	143	0	0	0	0	0	0	0	0	0	0
VA1090	Honshu	161	161	187	189	136	135	247	248	0	0	98	98	0	0	0	0	0	0	0	0	189	189	0	0	0	0	0	0	147	147	142	142	271	275	143	143	0	0	0	0	0	0	0	0	271	271
VA1849	Honshu	159	164	189	189	149	149	248	248	0	0	96	96	0	0	0	0	0	0	0	0	202	204	0	0	0	0	0	0	147	147	0	0	283	276	143	143	0	0	0	0	0	0	0	0	0	0
A1793	Liaodong	0	0	0	0	157	159	0	0	249	249	96	98	107	107	235	235	0	0	291	291	191	195	0	0	226	226	182	182	0	0	0	0	0	0	143	145	0	0	255	256	0	0	0	0	0	0
A1794	Liaodong	0	0	189	192	0	0	0	0	0	0	96	98	0	0	235	237	163	165	0	0	191	195	121	122	0	0	0	0	0	0	156	156	276	276	143	145	0	0	0	0	0	0	0	0	0	0
A1795	Liaodong	0	0	0	0	0	0	248	248	0	0	96	96	107	107	235	235	163	163	0	0	191	203	0	0	226	226	0	0	0	0	0	0	0	0	144	143	0	0	0	0	212	212	0	0	267	270
A1797	Liaodong	161	161	189	192	0	0	0	0	0	0	98	98	107	107	235	237	0	0	299	317	189	195	124	124	0	0	0	0	0	0	142	142	0	0	142	144	230	230	0	0	0	0	109	109	267	267
A1799	Liaodong	164	164	0	0	157	159	0	0	0	0	98	98	107	107	235	235	0	0	0	0	191	195	0	0	0	0	0	0	147	150	152	152	0	0	0	0	0	0	0	0	0	0	0	0	267	267
Cm01	commercial	159	160	189	191	157	157	248	248	255	270	96	98	126	128	240	240	0	0	294	330	191	195	124	124	226	235	169	169	151	161	142	142	274	276	145	145	237	239	264	268	212	212	109	109	265	267
Cm02	commercial	160	163	189	191	157	157	248	252	239	262	98	98	107	128	240	244	0	0	294	330	192	202	118	124	251	251	169	176	151	151	142	142	271	276	0	0	237	237	262	262	212	212	109	109	267	279
Cm03	commercial	159	163	189	191	152	157	248	248	239	262	92	92	126	128	240	242	0	0	301	317	204	204	124	124	226	226	169	182	149	161	154	156	274	274	143	143	237	239	256	262	210	212	109	109	265	265
Cm04	commercial	159	159	187	191	157	159	248	248	235	262	92	98	107	126	240	240	0	0	294	317	189	191	124	135	226	226	169	169	151	151	142	142	276	276	143	143	237	239	260	268	212	212	109	109	267	286
Cm05	commercial	159	161	189	191	137	157	248	254	239	239	98	98	107	107	240	242	0	0	317	317	195	204	124	124	226	226	169	169	147	151	142	156	271	274	145	145	237	239	262	264	210	212	109	109	269	286
Cm06	commercial	159	163	189	189	152	157	248	248	239	255	98	98	107	128	244	244	0	0	312	326	195	195	124	124	226	226	169	186	151	151	142	142	274	276	143	143	237	237	262	270	212	212	109	109	265	267
Cm07	commercial	159	160	189	189	157	157	248	254	239	247	92	96	126	128	242	242	0	0	317	317	192	202	124	129	235	251	169	182	149	159	142	152	270	270	123	145	235	239	262	262	210	212	109	109	265	267
Cm08	commercial	159	160	187	189	157	157	248	248	235	239	98	98	107	107	242	242	0	0	294	312	195	195	124	124	226	233	174	182	151	161	142	142	276	276	143	143	237	237	260	262	212	212	109	109	266	267
Cm09	commercial	159	160	187	187	157	157	248	248	239	270	92	98	107	128	244	244	161	163	294	317	189	202	124	124	228	234	169	182	147	161	142	142	270	274	143	143	237	237	256	262	212	212	109	109	259	259
Cm10	commercial	160	161	189	189	157	157	248	248	247	270	94	98	107	128	240	242	163	165	294	317	192	202	118	129	227	227	169	182	151	157	142	156	270	276	143	143	237	237	264	268	212	212	109	109	259	265
Cm11	commercial	160	160	189	191	152	157	248	248	239	270	92	98	107	128	240	242	165	165	294	312	189	191	130	130	234	234	169	173	147	151	142	142	270	274	142	142	237	239	256	268	210	212	109	109	260	267
Cm12	commercial	159	159	187	189	137	157	248	248	239	247	98	98	128	128	240	242	163	163	317	317	191	191	0	0	0	0	169	175	151	157	0	0	274	274	143	143	237	239	256	262	210	212	109	109	265	265
Cm13	commercial	159	159	187	187	157	157	248	248	239	247	92	98	126	128	242	244	163	163	312	317	189	191	124	129	226	233	173	177	151	157	142	142	270	274	143	143	237	237	256	262	212	212	109	109	261	279
Cm14	commercial	160	160	189	189	157	157	248	254	239	270	94	98	128	128	238	240	161	163	294	330	195	195	124	129	226	232	182	186	149	155	142	142	270	277	142	143	230	239	262	264	212	212	109	109	261	279
Cm15	commercial	163	164	187	189	137	157	248	248	239	270	98	98	107	126	240	242	161	163	294	315	191	202	118	129	233	251	169	169	151	151	142	142	270	276	142	142	238	238	262	270	210	212	109	109	266	266
Cm16	commercial	160	166	191	191	159	159	248	248	239	239	92	98	128	128	240	242	163	163	317	317	191	202	124	124	232	251	169	182	151	161	142	142	270	271	142	143	235	238	262	268	212	212	109	109	267	269
Cm17	commercial	159	159	188	188	137	157	248	248	239	270	92	92	107	107	240	240	163	165	301	317	191	195	124	124	232	233	169	175	157	161	152	156	270	271	143	143	235	237	256	264	212	212	109	109	260	265
Cm18	commercial	159	160	187	189	137	157	248	248	239	239	94	94	107	138	240	242	163	163	294	312	192	202	124	124	226	226	169	169	161	163	142	156	274	276	143	143	237	239	256	262	212	212	109	109	267	267
Cm19	commercial	159	159	187	189	152	157	248	254	239	255	98	98	107	128	238	244	163	165	301	330	202	202	124	129	226	233	169	182	151	151	142	142	270	274	143	143	237	237	256	270	212	212	109	109	261	267
Cm20	commercial	159	160	187	189	152	155	248	248	235	239	94	98	107	107	240	240	163	165	315	315	195	195	124	124	226	233	169	169	151	151	142	152	274	274	143	143	237	237	256	262	210	212	109	109	261	267
Cm21	commercial	159	160	189	191	157	157	248	248	270	270	102	102	107	128	240	242	163	163	330	330	191	195	124	124	226	226	184	190	151	155	142	142	274	276	142	142	237	237	260	262	212	212	109	109	267	267
Cm22	commercial	159	159	189	191	137	157	248	248	239	270	98	102	107	128	238	240	161	163	294	317	195	198	124	124	234	234	169	182	147	151	142	154	276	276	143	143	237	237	256	262	212	212	109	109	258	267
Cm23	commercial	159	163	187	189	152	157	248	248	239	270	96	98	107	128	240	242	163	163	294	317	189	195	124	130	227	228	173	182	151	161	142	152	274	276	0	0	237	239	256	262	212	212	109	109	260	267
Cm24	commercial	159	163	187	187	157	157	248	248	239	270	98	98	107	128	240	240	163	163	317	317	191	195	124	124	227	227	173	182	147	151	142	154	270	274	0	0	237	237	256	270	208	212	109	109	265	269
Cm25	commercial	159	160	189	191	137	157	248	248	262	270	94	98	107	107	240	244	163	165	294	330	202	204	124	135	232	232	186	190	151	155	142	142	270	276	143	143	237	237	256	262	212	212	109	109	265	265
Cm26	commercial	160	163	187	189	152	157	248	254	239	270	98	98	107	107	242	242	163	165	317	330	191	202	124	124	234	235	165	186	147	153	142	142	271	276	143	143	230	239	258	262	212	212	109	109	265	265
Cm27	commercial	160	160	187	187	157	157	248	248	239	239	92	94	107	107	238	244	163	163	317	330	195	202	124	124	228	228	169	186	155	161	142	142	271	274	143	0	239	239	256	264	212	212	109	109	261	261
Cm28	commercial	159	161	189	191	137	157	248	250	270	270	94	94	107	128	238	240	163	165	312	317	191	195	0	0	227	227	182	182	147	147	142	142	276	276	143	143	235	237	256	256	212	212	109	109	265	265
Cm29	commercial	159	160	187	189	157	157	248	248	239	270	98	98	107	107	238	242	163	163	312	317	191	195	124	124	227	227	182	184	147	147	142	142	270	276	142	142	237	237	262	262	212	212	109	109	267	267
Cm30	commercial	159	159	187	187	157	157	248	248	234	239	96	96	107	128	238	240	165	165	301	303	191	195	124	124	234	234	173	173	147	147	142	142	270	276	123	123	237	239	256	270	212	212	109	109	266	266
Cm31	commercial	160	160	187	191	157	159	248	248	239	270	96	98	126	128	240	244	163	163	317	330	191	195	124	124	234	234	169	169	151	151	142	142	274	276	0	0	237	237	262	268	212	212	109	109	261	267
Cm32	commercial	159	163	189	191	157	157	248	248	239	270	96	96	107	128	240	242	163	165	317	317	195	195	124	130	228	232	182	182	151	153	142	142	270	276	143	143	237	239	262	262	212	212	109	109	265	267
Cm33	commercial	159	159	187	189	157	157	248	248	239	270	98	102	107	107	238	244	163	165	294	317	195	195	124	124	232	232	182	184	147	151	142	142	270	276	143	143	235	237	256	262	212	212	109	109	267	267
Cm34	commercial	159	161	189	189	157	157	248	248	270	270	98	98	107	107	238	240	163	165	303	312	191	195	124	124	234	234	173	190	151	159	142	154	274	274	0	0	237	239	262	270	210	212	109	109	265	266
Cm35	commercial	159	160	189	189	157	157	248	248	239	270	102	102	126	126	240	242	163	163	303	330	189	195	124	130	226	226	169	182	147	151	142	142	274	274	143	143	237	237	256	270	210	212	109	109	265	265
Cm36	commercial	159	159	189	189	152	157	248	248	234	239	92	98	128	128	242	244	163	165	317	330	195	204	124	130	234	235	169	182	151	151	142	152	270	274	143	143	237	237	262	262	212	212	109	109	267	267
Cm37	commercial	159	160	187	189	152	157	248	248	239	270	102	102	107	128	242	242	0	0	294	301	189	195	124	137	0	0	182	186	151	163	142	142	276	276	0	0	230	230	264	270	212	212	109	109	265	265
Cm38	commercial	159	160	187	191	137	157	248	248	239	239	92	92	126	128	238	242	163	163	294	301	195	195	118	124	232	235	169	182	151	163	142	142	271	276	0	0	237	237	256	262	212	212	109	109	265	267
Cm39	commercial	159	160	189	191	157	159	248	248	239	262	94	94	126	126	240	242	163	163	303	317	195	202	124	130	226	226	169	182	155	155	142	142	271	276	142	142	235	235	256	256	212	212	109	109	265	266
Cm40	commercial	159	163	187	191	137	157	248	248	239	270	94	98	107	107	240	244	163	163	301	330	191	204	124	130	234	235	182	182	151	159	142	152	270	271	0	0	230	239	256	262	212	212	109	109	269	269
Cm41	commercial	159	160	187	189	155	157	248	248	239	247	98	98	128	128	244	244	163	165	317	330	195	195	124	124	228	228	173	173	147	153	142	156	276	276	143	143	237	237	256	262	210	212	109	109	267	267
Cm42	commercial	159	159	187	189	157	157	248	248	234	270	92	98	107	126	240	242	163	163	294	294	192	202	124	124	226	228	175	182	147	151	142	142	274	276	123	123	237	237	256	262	212	212	109	109	266	267
Cm43	commercial	159	163	187	191	137	157	248	248	239	270	94	98	107	107	240	244	163	163	301	330	191	204	124	130	234	235	182	182	151	159	142	152	270	271	0	0	230	239	256	262	212	212	109	109	269	269
Cm44	commercial	160	160	187	187	157	157	248	248	239	239	96	96	107	128	240	240	0	0	294	317	191	202	124	133	234	234	173	190	149	155	142	142	0	0	0	0	237	237	256	268	212	212	109	109	267	267
Cm45	commercial	159	163	187	189	157	157	248	248	239	239	94	102	107	128	242	242	163	163	294	330	191	195	124	124	228	234	182	190	149	161	142	142	270	276	143	143	237	239	256	262	212	212	109	109	265	267
Cm46	commercial	159	159	187	189	157	157	248	248	234	270	92	98	107	126	238	240	163	165	294	294	195	202	118	124	227	234	173	182	147	151	142	156	0	0	0	0	237	237	256	256	210	212	109	109	265	267
Cm47	commercial	0	0	189	189	157	157	248	248	239	270	98	102	107	126	240	242	165	165	294	330	195	202	118	137	227	234	182	182	147	163	142	142	274	277	142	142	237	239	256	262	212	212	109	109	266	267
Cm48	commercial	159	163	189	191	157	157	248	248	239	239	94	98	128	128	238	240	165	165	330	330	191	195	124	124	227	228	169	182	147	151	142	152	270	277	0	0	237	237	260	270	212	212	109	109	267	267
Cm49	commercial	160	160	189	191	157	157	248	248	239	270	96	98	128	128	240	240	163	165	294	294	202	202	118	118	227	234	173	186	151	151	142	142	274	277	123	123	237	239	262	262	212	212	109	109	265	267
Cm50	commercial	159	160	187	189	157	157	248	248	239	270	98	98	107	128	242	242	163	163	317	326	191	202	124	124	227	234	173	184	151	153	142	142	270	277	0	0	230	237	262	264	210	212	109	109	267	267
Cm51	commercial	160	160	187	189	157	159	248	248	239	270	92	94	107	107	238	242	163	165	294	330	189	202	130	130	234	234	173	186	151	155	142	142	274	276	143	143	235	239	262	264	212	212	109	109	261	266
Cm52	commercial	159	161	187	189	137	157	248	248	239	239	98	98	107	107	238	242	163	163	301	330	195	202	137	137	251	251	169	186	151	161	142	142	270	277	0	0	237	237	260	268	212	212	109	109	266	267
Cm53	commercial	159	159	189	191	157	159	248	248	270	270	94	94	107	128	240	242	163	165	330	330	191	191	118	124	234	234	169	173	155	159	142	142	270	274	0	0	237	237	262	262	212	212	109	109	265	267
Cm54	commercial	159	160	187	189	155	157	248	248	270	270	98	98	126	128	240	242	163	163	294	330	195	202	124	130	234	251	182	182	151	157	142	142	271	274	143	145	235	237	256	262	210	212	109	109	266	266
Cm55	commercial	159	159	187	191	137	157	248	248	270	270	98	98	126	128	240	244	163	163	294	317	191	192	124	124	227	227	169	182	147	151	142	142	277	277	143	143	230	235	256	268	212	212	109	109	267	267
Cm56	commercial	159	159	189	191	159	159	248	248	239	247	98	98	107	107	242	242	163	163	294	317	191	202	124	124	227	234	169	182	147	151	142	152	277	277	143	143	237	239	256	270	212	212	109	109	265	265
Cm57	commercial	159	163	189	191	137	157	248	248	239	270	94	102	107	107	240	242	163	165	312	326	191	195	124	130	226	234	182	182	151	155	142	142	277	277	0	0	230	239	256	260	212	212	109	109	0	0
