# Supplementary material for: Genetic Divergence in Domestic Japanese Quail Inferred from Mitochondrial DNA D-Loop and Microsatellite Markers
Source: PLoS One. 2017 Jan 20;12(1):e0169978. doi: 10.1371/journal.pone.0169978 (PMC5249226; doi:10.1371/journal.pone.0169978)
Supplement: S1 Table — (XLSX) [file pone.0169978.s004.xlsx]

## Sheet: Table S1
S1 Table. List of wild Japanese quail used in this study and their individual information
Specimen number	Locality	Original source*	Sample material	Age of specimen	D-loop haplotype	Accession number	No. of amplified microsatellite markers
YIO63894	Tsushima Is.	YIO	muscle tissue	Nov. 2005	W3	LC086841	23
YIO64458	Tsushima Is.	YIO	muscle tissue	Nov. 2005	D2	LC086842	23
WildT01**	Nagano Pref***, Honshu	TMNH	feather	‒	D1	LC086843	10
WildT02**	Nagano Pref***, Honshu	TMNH	feather	‒	D1	LC086844	11
WildT03**	Nagano Pref***, Honshu	TMNH	feather	‒	D1	LC086845	8
WildT04**	Nagano Pref***, Honshu	TMNH	feather	‒	W2	LC086846	11
A0279	Osaka Pref, Honshu	OMNH	feather	Oct. 1995	W1	LC086847	20
A1791	Kyoto Pref, Honshu	OMNH	feather	Jan. 1993	D1	LC086848	6
A1796	Tokyo Pref, Honshu	OMNH	feather	Dec. 1939	D1	LC086849	8
A1798	Tokyo Pref, Honshu	OMNH	feather	Nov. 1912	D1	LC086850	5
A1800	Kyoto Pref, Honshu	OMNH	feather	Jan. 1993	D1	LC086851	7
VA744	Gunma Pref***, Honshu	GMNH	feather	‒	‒†	‒	14
VA745	Gunma Pref***, Honshu	GMNH	feather	‒	D1	LC086852	12
VA945	Gunma Pref***, Honshu	GMNH	feather	‒	‒†	‒	8
VA1090	Gunma Pref***, Honshu	GMNH	feather	‒	‒†	‒	11
VA1849	Gunma Pref***, Honshu	GMNH	feather	‒	D1	LC086853	9
A1793	the Liaodong Peninsula	OMNH	feather	Feg. 1938	D2	LC086854	11
A1794	the Liaodong Peninsula	OMNH	feather	Mar. 1938	D2	LC086855	9
A1795	the Liaodong Peninsula	OMNH	feather	Mar. 1938	D2	LC086856	10
A1797	the Liaodong Peninsula	OMNH	feather	Mar. 1938	D1	LC086857	13
A1799	the Liaodong Peninsula	OMNH	feather	Nov. 1932	D1	LC086858	9
*YIO, Yamashina Institute for Ornithology; TMNH, Togakushi Museum of Natural History; OMNH, Osaka Museum of Natural Hisotry; GMNH, Gunma Museum of Natural Hisotry
**The specimens do not have any specimen numbers. We assigned numbers for convenience.
***The detailed localities have not been recorded.
†mtDNA D-loop region was not amplified.
